# Supplementary material
Source: PubMed Central journal article supplement (PMC3819251)
Supplement: halms719917-supplement_1.pdf [file halms719917-supplement_1.pdf]

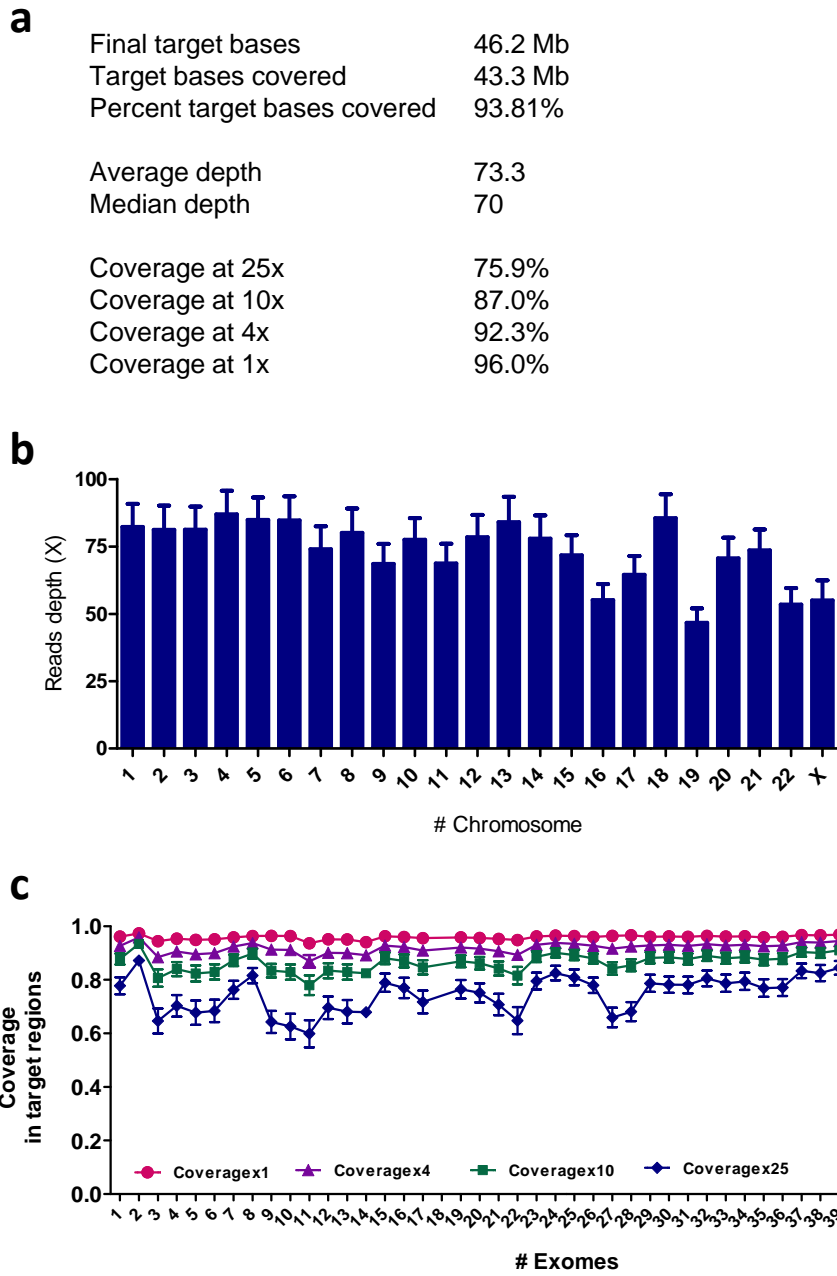

### Supplementary Figure 1. Statistics of mapping of sequencing reads

**a**, summary statistics for whole-exome sequence reads of 24 HCC with their non tumor liver tissues. **b**, mean depth (with 95% IC) of reads on each chromosome, **c**, cumulative fraction of coding bases covered in captured regions. A 1-fold, 4-fold, 10-fold and 25-fold coverage were considered (mean with 95% IC) per exome (numbered #1-48).

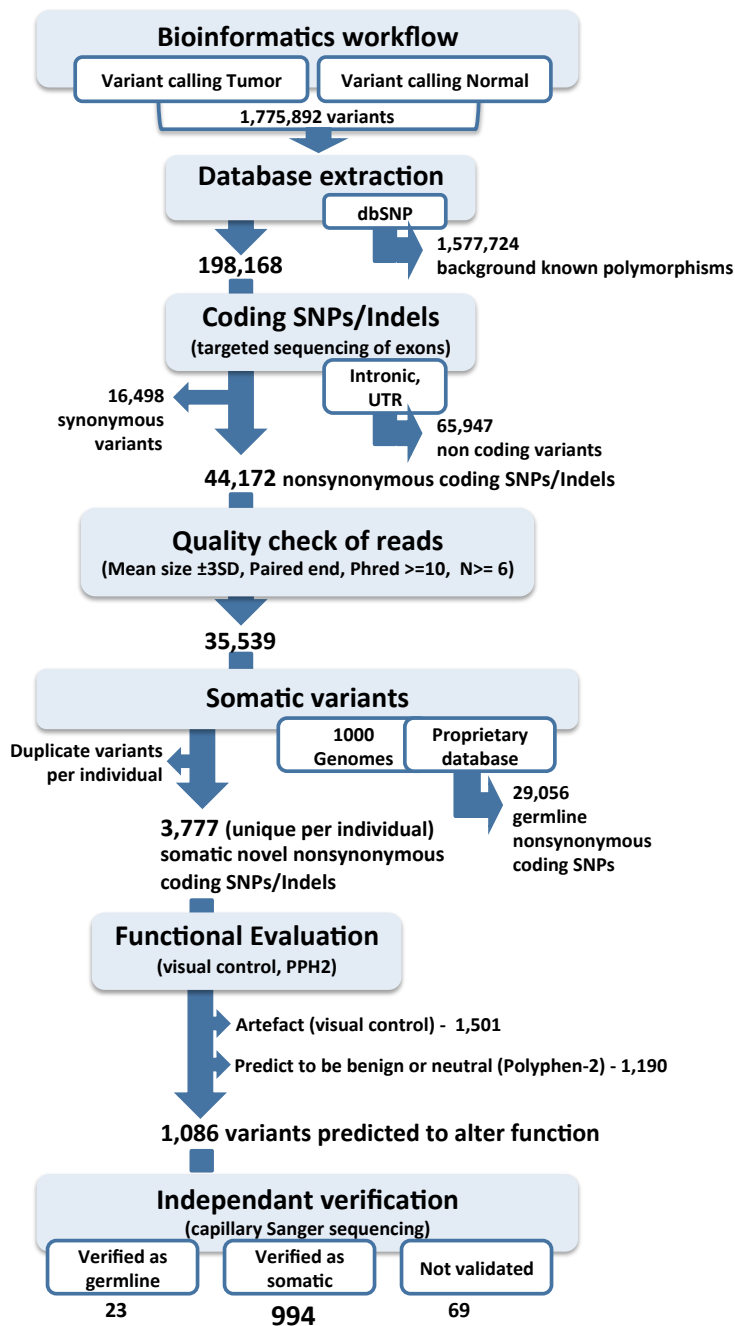

**Supplementary Figure 2. Whole-exome sequencing analysis flowchart.**

Extraction of functionally somatic gene mutations for 24 HCC. Boxes refer to major bioinformatics steps; arrows indicate the number of variants obtained or removed from subsequent analysis. Variants were filtered for their coding localization, annotation in dbSNP31 or 1000 genomes, somatic and functionally impairment. The per-base and reads quality scores were used to filter false positive gene mutation events.

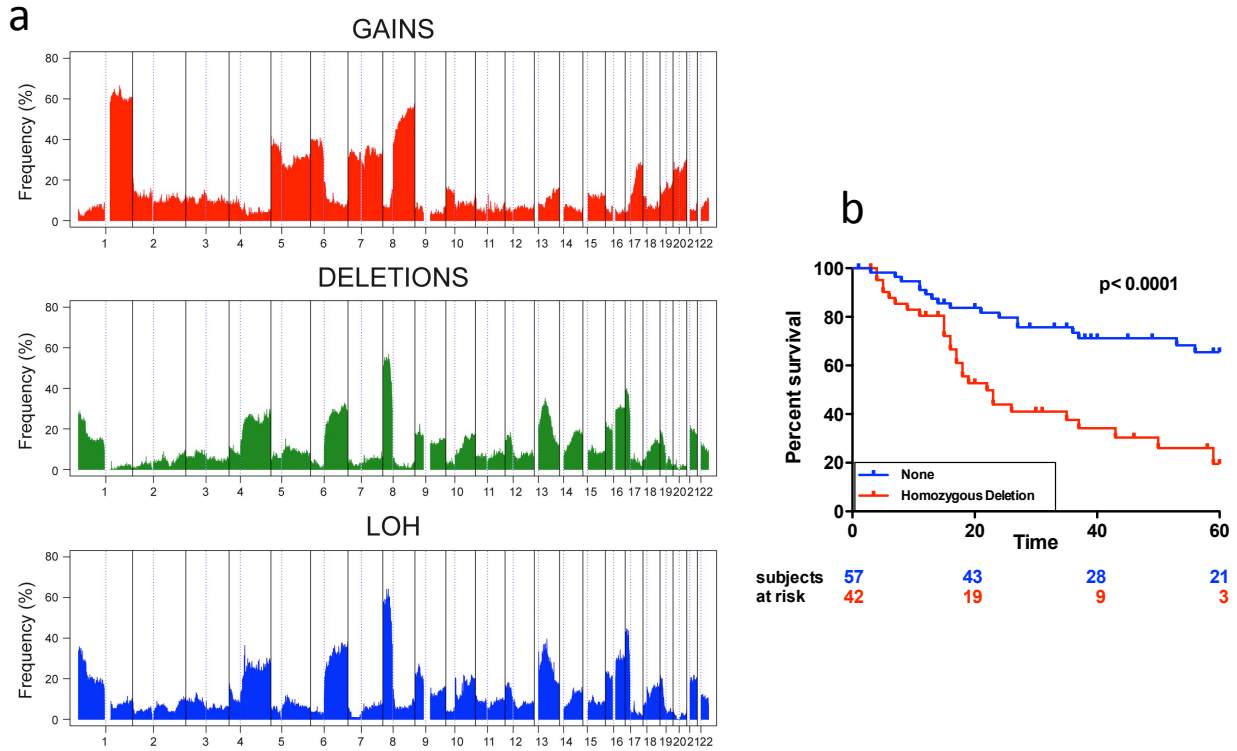

**Supplementary Figure 3.** Genome-wide copy number changes and recurrent homozygous deletions in HCC. **a**, Frequency of gains, deletions, and losses of heterozygosity (LOH) along the genome in a series of 125 HCC. **b**, Kaplan-Meier analysis comparing survival of cases presenting homozygous deletions (n=42) versus those without local losses (n=57). Univariate Cox P-value for risk index is included. Only patients with curative (R0) resection were included in survival analysis.

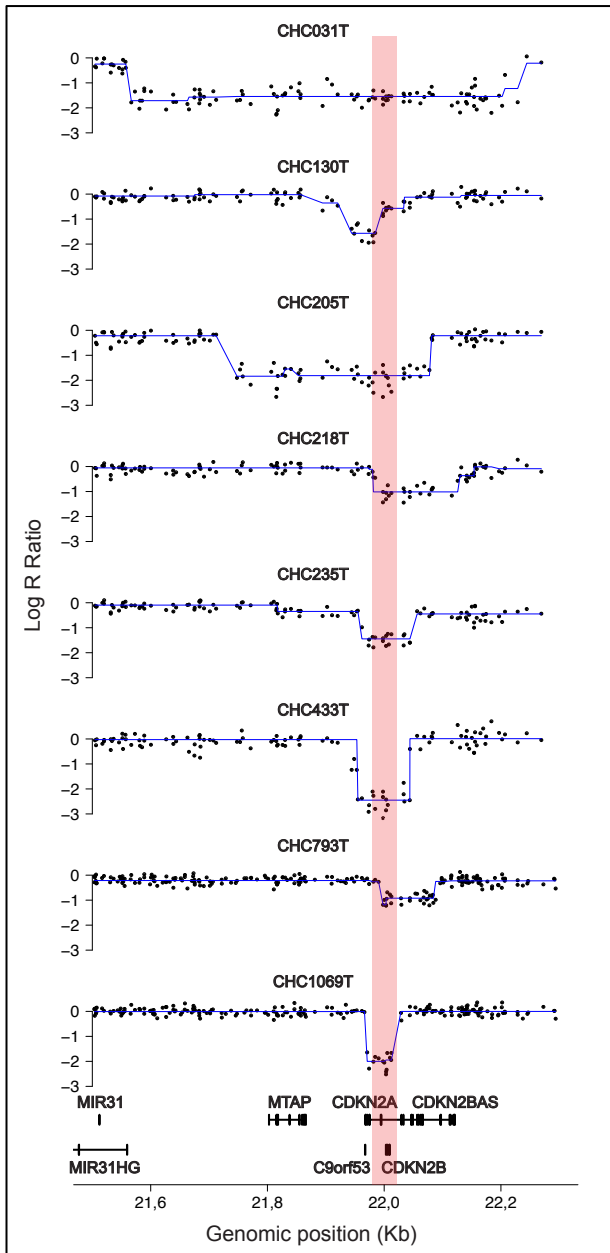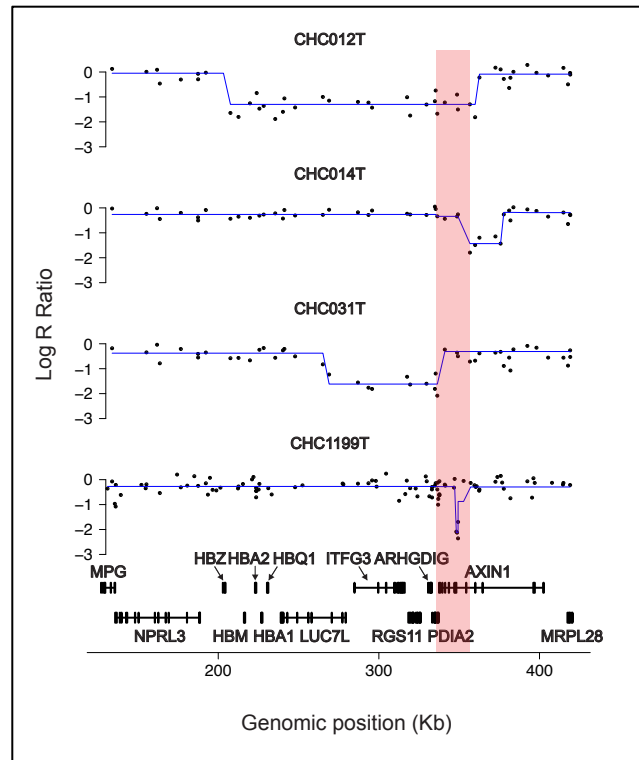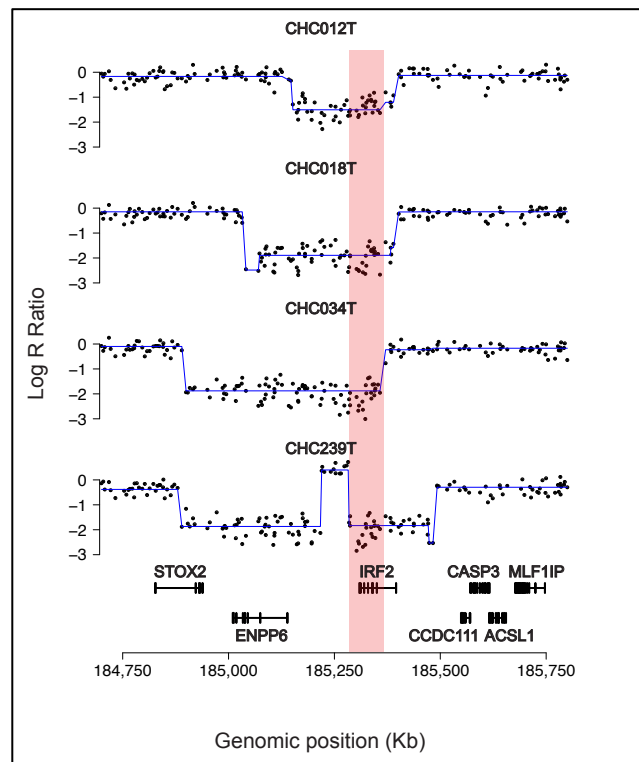

**Supplementary Figure 4.** Recurrent homozygous deletions at *CDKN2A/B*, *AXIN1* and *IRF2* loci. Raw log R ratios are represented as black dots, and smoothed log R ratios as blue lines. The minimal region of loss is indicated in red for each region.

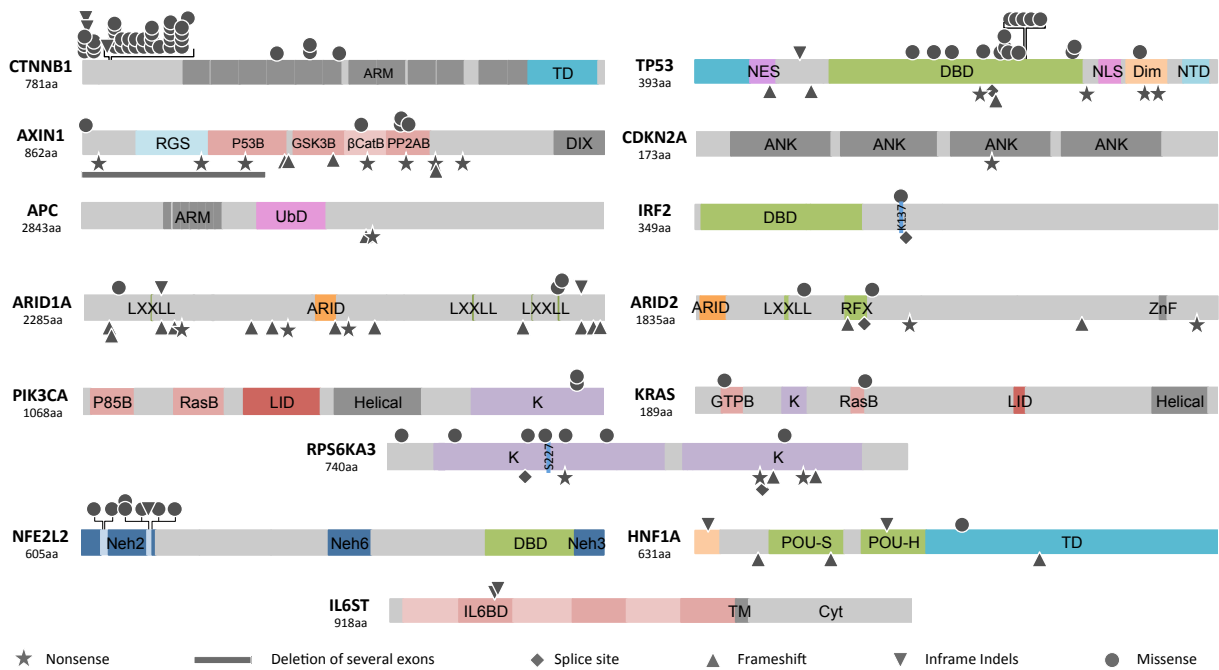

**Supplementary Figure 5.** Somatic mutation spectra in 125 HCC. Inactivating and activating mutations are shown above and below the core protein, respectively. Functional domains are colored boxes. ANK: Ankyrin repeat, ARM: Armadillo repeat,  $\beta$ CatB:  $\beta$ Catenin binding Domain, Cyt: Cytosolic Domain, DBD: DNA Binding domain, Dim: Dimerization Domain, GSK3B: GSK3 Binding Domain, GTPB: GTP binding Domain, IL6BD: IL6 Binding Domain, K: Kinase domain, LID: Lipid interaction domain, Neh: Nrf2-ECH Homology Domain, NES: Nuclear Export Signal, NLS: Nuclear Localization Signal, NTD: Negative Transactivation Domain, P53B: P53 Binding Domain, P85B: P85 Binding Domain, PP2AB: PP2A Binding Domain, RasB: Ras Binding Domain, RGS: regulator of G-protein signalling, TD: Transactivation domain, TM: Transmembrane domain, UbD: Ubiquitinated domain.

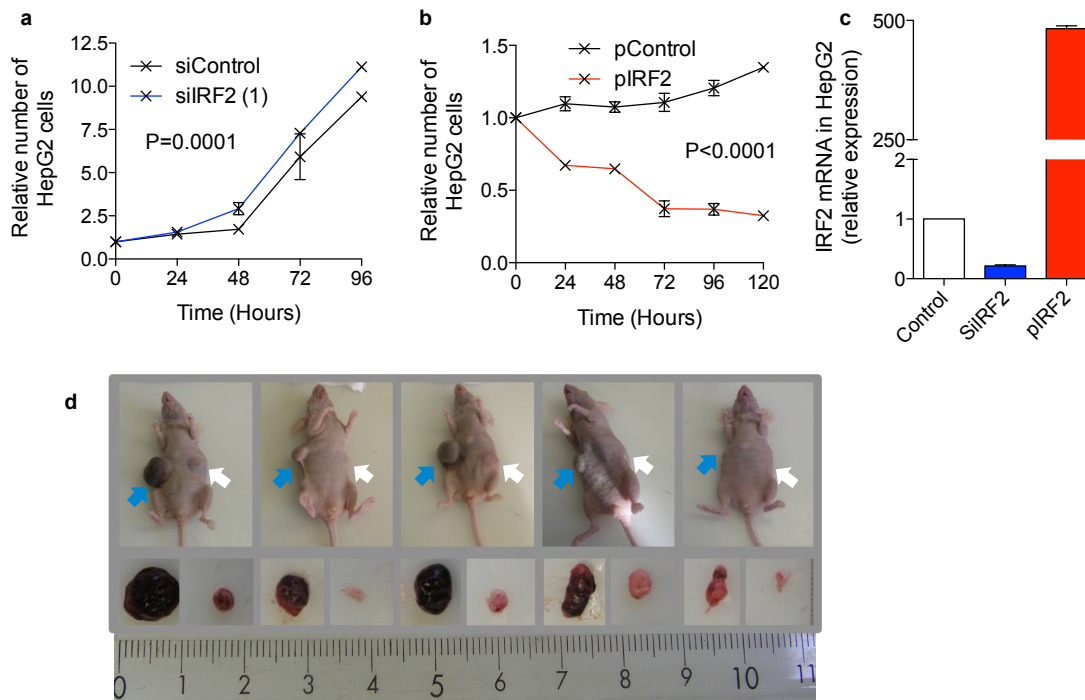

**Supplementary Figure 6. IRF2 as a new tumor suppressor gene in HCC controlling p53 pathway**

**a**, Effect of *in vitro* IRF2 silencing in HepG2 hepatoblastoma cell line: increased cell proliferation with IRF2 siRNA (SiIRF2) when compared to control siRNA (triplicates, mean±SD, regression analysis). **b**, IRF2 overexpression in HepG2 cell line by transfection of a plasmid containing the coding sequence of IRF2 (pIRF2) induced dramatic cell death when compared to HepG2 transfected with an empty plasmid (pControl; triplicates, mean±SD, regression analysis) **c**. Relative mRNA expression was quantified by qRT-PCR ( $n=3$ ; mean ± SD). **d**. Xenograft model in CD1 nude mice injected in right flank with HepaRG stably transfected with ShIRF2(1) (blue arrow) and in left flank with HepaRG stably transfected with ShControl (white arrow). Respective subcutaneous tumors after 4 weeks of cell injection are displayed below.

**Supplementary Table 1: Clinical, histological and molecular data of HCC**

|                                      | 24 HCC (Exome sequencing)                              | 125 HCC (series of validation)                          |
|--------------------------------------|--------------------------------------------------------|---------------------------------------------------------|
| <b>Age</b>                           |                                                        |                                                         |
| < 60 years                           | 3 (12.5%)                                              | 46 (37%)                                                |
| ≥ 60 years                           | 21 (87.5%)                                             | 79 (63%)                                                |
| <b>Gender</b>                        |                                                        |                                                         |
| Male                                 | 20 (83%)                                               | 100 (80%)                                               |
| Female                               | 4 (17%)                                                | 25 (20%)                                                |
| <b>Etiology<sup>(*)</sup></b>        |                                                        |                                                         |
| HCV                                  | 4 (17%)                                                | 24 (19%)                                                |
| HBV                                  | 1 (4%)                                                 | 35 (28%)                                                |
| Alcohol                              | 12 (50%)                                               | 43 (34%)                                                |
| NASH                                 | 2 (8%)                                                 | 5 (4%)                                                  |
| Hemochromatosis                      | 0 (0%)                                                 | 6 (5%)                                                  |
| Other                                | 7 (29%)                                                | 26 (21%)                                                |
|                                      | <sup>(*)</sup> including 2 cases with ≥ 2 risk factors | <sup>(*)</sup> including 14 cases with ≥ 2 risk factors |
| <b>Tumor size ( n=124)</b>           |                                                        |                                                         |
| ≤ 50 mm                              | 12 (50%)                                               | 56 (45%)                                                |
| > 50 mm                              | 12 (50%)                                               | 68 (55%)                                                |
| <b>Tumor features</b>                |                                                        |                                                         |
| Unique nodule (n=124)                | 18 (75%)                                               | 94 (76%)                                                |
| Satellites nodules (n=124)           | 9 (38%)                                                | 59 (48%)                                                |
| Vascular invasion (n=122)            | 11 (46%)                                               | 61 (50%)                                                |
| <b>Differentiation ( n=120)</b>      |                                                        |                                                         |
| Edmonson I-II                        | 11 (48%)                                               | 60 (50%)                                                |
| Edmonson III-IV                      | 12 (52%)                                               | 60 (50%)                                                |
| <b>Non tumor liver ( n=124)</b>      |                                                        |                                                         |
| Metavir score F0-F1                  | 9 (37%)                                                | 45 (36%)                                                |
| Metavir score F2-F3                  | 7 (29%)                                                | 33 (27%)                                                |
| Metavir score F4                     | 8 (33%)                                                | 46 (37%)                                                |
| <b>Apha Focto Protein (n=108)</b>    |                                                        |                                                         |
| ≥ 24 ng/ml                           | 7 (37%)                                                | 52 (48%)                                                |
| <b>Mutations</b>                     |                                                        |                                                         |
| <i>TP53</i>                          | 3 (13%)                                                | 26 (21%)                                                |
| <i>CTNNB1</i>                        | 11 (46%)                                               | 41 (33%)                                                |
| <i>AXIN1</i>                         | 5 (21%)                                                | 19 (15%)                                                |
| <i>CDKN2A</i>                        | 2 (8%)                                                 | 9 (7%)                                                  |
| <i>KRAS</i>                          | 0 (0%)                                                 | 2 (1.6%)                                                |
| <i>ARID2</i>                         | 2 (8%)                                                 | 7 (5.6%)                                                |
| <b>Transcriptome Groups ( n=123)</b> |                                                        |                                                         |
| G1                                   | 1 (4%)                                                 | 15 (12%)                                                |
| G2                                   | 0 (0%)                                                 | 13 (11%)                                                |
| G3                                   | 4 (17%)                                                | 19 (16%)                                                |
| G4                                   | 8 (33%)                                                | 38 (30%)                                                |
| G5                                   | 7 (29%)                                                | 25 (20%)                                                |
| G6                                   | 4 (17%)                                                | 13 (11%)                                                |

Supplementary Table 2: Clinical, histological and molecular data of HCC

| ID       | Age (year) | Gender | Etiology | Tumor size (mm) | Microscopic Vascular Invasion | BCLC | Edmonson | META VIR | AFP (ng/ml) | Transcriptome subgroups | Ploidy | FAA  | PFS time | PFS status | OS time | OS status |
|----------|------------|--------|----------|-----------------|-------------------------------|------|----------|----------|-------------|-------------------------|--------|------|----------|------------|---------|-----------|
| CHC008T  | 73         | F      | HBV      | 20              | no                            | 0    | I-II     | F4       | ≥24         | G4                      | 2      | 0    | 1        | 1          | 7       | 1         |
| CHC012T  | 35         | M      | HBV      | 80              | yes                           | A    |          | F4       | ≥24         | G1                      | 3      | 0.63 | 8        | 1          | 15      | 1         |
| CHC013T  | 62         | M      | HCV      | 30              | yes                           | A    | I-II     | F4       | ≥24         | G5                      | 2      | 0.16 | 6        | 1          | 15      | 1         |
| CHC014T  | 29         | M      | HBV      | 130             | yes                           | A    | III-IV   | F2-F3    | ≥24         | G3                      | 3      | 0.74 | 3        | 1          | 5       | 1         |
| CHC018T  | 34         | F      | HBV      | 170             | yes                           | A    | III-IV   | F2-F3    | ≥24         | G1                      | 3      | 0.34 | 14       | 1          | 35      | 1         |
| CHC028T  | 63         | M      | HCV      | 30              | yes                           | A    | III-IV   | F4       | <24         | G6                      | 3      | 0.61 | 40       | 1          | 60      | 0         |
| CHC031T  | 67         | M      | AL       | 16              | no                            | 0    | I-II     | F4       | <24         | G5                      | 3      | 0.76 | 15       | 1          | 26      | 1         |
| CHC032T  | 59         | M      | HBV      | 25              | no                            | B    | I-II     | F4       | ≥24         | -                       | 2      | 0    | NE       | NE         | NE      | NE        |
| CHC033T  | 38         | M      | HBV      | 250             | yes                           | C    | III-IV   | F2-F3    | ≥24         | -                       | 2      | 0.32 | NE       | NE         | NE      | NE        |
| CHC034T  | 55         | M      | HBV      | 170             | yes                           | A    | III-IV   | F2-F3    | ≥24         | G2                      | 3      | 0.63 | 12       | 1          | 23      | 1         |
| CHC037T  | 50         | M      | Other    | 120             | no                            | A    | I-II     | F0-F1    | <24         | G4                      | 2      | 0.47 | 60       | 0          | 60      | 0         |
| CHC043T  | 55         | M      | HBV      | 50              | no                            | A    | III-IV   | F2-F3    | ≥24         | G3                      | 4      | 0.82 | 58       | 0          | 58      | 0         |
| CHC046T  | 61         | F      | HBV      | 65              | yes                           | C    | III-IV   | F4       | ≥24         | G3                      | 3      | 0.74 | 12       | 0          | 12      | 0         |
| CHC051T  | 68         | F      | HCV      | 60              | no                            | A    |          | F4       | ≥24         | G6                      | 2      | 0.13 | 32       | 1          | 53      | 1         |
| CHC059T  | 40         | M      | AL       | 80              | yes                           | C    | III-IV   | F0-F1    | ≥24         | G6                      | 2      | 0.05 | 16       | 1          | 16      | 1         |
| CHC060T  | 68         | M      | AL       | 28              | yes                           | C    | III-IV   | F4       | <24         | G1                      | 2      | 0    | 21       | 1          | 27      | 1         |
| CHC081T  | 75         | F      | HBV      | 90              | no                            | A    | I-II     | F4       | ≥24         | G4                      | 2      | 0.11 | NE       | NE         | NE      | NE        |
| CHC097T  | 56         | M      | Other    | 70              | yes                           | B    | I-II     | F0-F1    | <24         | G5                      | 2      | 0.16 | 13       | 1          | 37      | 1         |
| CHC100T  | 68         | M      | HCV AL   | 20              | yes                           | A    | III-IV   | F4       |             | G2                      | 4      | 0.42 | NE       | NE         | NE      | NE        |
| CHC1035T | 68         | M      | HBV AL   | 75              | no                            | A    | I-II     | F2-F3    | <24         | G5                      | 2      | 0.3  | 10       | 1          | 30      | 0         |
| CHC1040T | 72         | M      | AL       | 160             | yes                           | A    | III-IV   | F2-F3    | ≥24         | G4                      | 2      | 0.3  | 33       | 1          | 35      | 0         |
| CHC1041T | 68         | M      | Other    | 10              | no                            | 0    | I-II     | F0-F1    | <24         | G6                      | 2      | 0.2  | 35       | 0          | 35      | 0         |
| CHC1044T | 78         | M      | AL       | 16              | yes                           | 0    | III-IV   | F2-F3    | ≥24         | G1                      | 2      | 0.15 | 33       | 0          | 33      | 0         |
| CHC1052T | 75         | M      | AL       | 130             | yes                           | A    | III-IV   | F2-F3    | <24         | G4                      | 3      | 0.52 | 1        | 0          | 1       | 0         |
| CHC1053T | 73         | M      | AL       | 35              | yes                           | A    | III-IV   | F4       | ≥24         | G4                      | 2      | 0.15 | 19       | 1          | 19      | 1         |
| CHC1055T | 67         | M      | AL       | 200             | yes                           | B    | III-IV   | F2-F3    | ≥24         | G3                      | 2      | 0.15 | 6        | 1          | 6       | 1         |
| CHC1060T | 66         | M      | NASH     | 30              | no                            | A    | III-IV   | F4       |             | G4                      | 2      | 0    | 29       | 0          | 29      | 0         |
| CHC1061T | 79         | F      | Other    | 150             | yes                           | A    | I-II     | F0-F1    | <24         | G4                      | 4      | 0.28 | 13       | 1          | 39      | 0         |
| CHC1062T | 65         | M      | HM       | 30              | yes                           | A    | I-II     | F2-F3    | ≥24         | G2                      | 2      | 0    | 36       | 0          | 36      | 0         |
| CHC1065T | 77         | M      | Other    | 35              | yes                           | C    | I-II     | F0-F1    | <24         | G4                      | 2      | 0.12 | 22       | 1          | 40      | 0         |
| CHC1069T | 77         | M      | AL       | 50              | yes                           | A    | III-IV   | F2-F3    | <24         | G5                      | 2      | 0.28 | 3        | 0          | 3       | 0         |
| CHC1146T | 59         | M      | AL       | 170             | yes                           | C    | III-IV   | F0-F1    | ≥24         | G3                      | 2      | 0.25 | 16       | 1          | 18      | 1         |
| CHC1154T | 43         | M      | HBV      | 130             | yes                           | A    | I-II     | F2-F3    | ≥24         | G6                      | 3      | 0.45 | 60       | 0          | 60      | 0         |
| CHC115T  | 59         | M      | NASH     | 70              | yes                           | A    | I-II     | F0-F1    | <24         | G5                      | 4      | 0.11 | 24       | 1          | 60      | 0         |
| CHC1162T | 59         | M      | AL       | 55              |                               | B    | I-II     | F4       | <24         | G4                      | 2      | 0    | 60       | 0          | 60      | 0         |
| CHC1185T | 52         | M      | HBV      | 30              | no                            | A    | III-IV   | F4       | ≥24         | G1                      | 2      | 0.18 | 60       | 0          | 60      | 0         |
| CHC1190T | 68         | F      | HCV AL   | 22              | yes                           | A    | I-II     | F2-F3    | ≥24         | G4                      | 2      | 0    | 27       | 1          | 60      | 0         |
| CHC1192T | 40         | M      | HBV      | 70              | yes                           | A    | III-IV   | F4       | ≥24         | G2                      | 4      | 0.48 | 9        | 1          | 18      | 1         |
| CHC1196T | 26         | M      | HBV      | 90              | yes                           | A    | III-IV   | F2-F3    | ≥24         | G1                      | 2      | 0.13 | 3        | 1          | 11      | 1         |
| CHC1199T | 62         | M      | Other    | 140             | yes                           | C    | I-II     | F0-F1    | <24         | G2                      | 2      | 0.35 | 20       | 1          | 43      | 1         |
| CHC1201T | 72         | M      | AL       | 60              | no                            | A    | I-II     | F4       | <24         | G4                      | 3      | 0.45 | 30       | 1          | 60      | 0         |
| CHC121T  | 66         | M      | AL       | 120             | no                            | A    | I-II     | F0-F1    | <24         | G5                      | 2      | 0.18 | 60       | 0          | 60      | 0         |
| CHC123T  | 42         | M      | HBV      |                 |                               | 0    |          | F0-F1    |             | G4                      | 2      | 0.34 | 4        | 1          | 4       | 1         |
| CHC126T  | 68         | F      | HCV      | 70              | no                            | A    |          | F4       | ≥24         | G3                      | 3      | 0.61 | 60       | 0          | 60      | 0         |
| CHC129T  | 61         | F      | Other    | 130             | yes                           | A    | I-II     | F0-F1    | ≥24         | G5                      | 2      | 0.21 | 4        | 1          | 4       | 1         |
| CHC130T  | 60         | M      | Other    | 180             | no                            | A    | I-II     | F0-F1    | <24         | G5                      | 2      | 0.29 | 20       | 1          | 31      | 0         |
| CHC137T  | 71         | M      | HBV      | 35              | no                            | A    | III-IV   | F2-F3    | ≥24         | G5                      | 3      | 0.61 | 60       | 0          | 60      | 0         |
| CHC141T  | 67         | F      | Other    | 35              | yes                           | A    | III-IV   | F0-F1    | ≥24         | G1                      | 4      | 0.24 | 60       | 0          | 60      | 0         |
| CHC152T  | 64         | M      | HBV      | 30              | no                            | C    |          | F4       | <24         | G6                      | 2      | 0.11 | NE       | NE         | NE      | NE        |
| CHC154T  | 67         | F      | Other    | 90              | no                            | A    | I-II     | F0-F1    | <24         | G4                      | 2      | 0.11 | 16       | 1          | 49      | 0         |
| CHC155T  | 62         | M      | AL       | 35              | no                            | A    | I-II     | F4       | <24         | G4                      | 2      | 0.03 | 16       | 1          | 20      | 0         |
| CHC158T  | 65         | M      | HBV AL   | 25              | no                            | A    | I-II     | F4       | <24         | G4                      | 2      | 0.24 | 20       | 0          | 20      | 0         |
| CHC164T  | 65         | M      | Other    | 100             | no                            | B    | I-II     | F0-F1    | <24         | G5                      | 2      | 0.32 | 36       | 1          | 36      | 1         |
| CHC168T  | 67         | M      | AL       | 100             | yes                           | A    | I-II     | F4       | ≥24         | G6                      | 2      | 0.24 | 3        | 1          | 3       | 1         |
| CHC191T  | 71         | M      | AL       | 110             | yes                           | C    | I-II     | F0-F1    | <24         | G4                      | 2      | 0.13 | 11       | 1          | 11      | 1         |
| CHC195T  | 71         | M      | AL       | 70              | no                            | A    | I-II     | F0-F1    | <24         | G4                      | 2      | 0.32 | 60       | 0          | 60      | 0         |
| CHC196T  | 33         | M      | Other    | 100             | no                            | A    | I-II     | F0-F1    | <24         | G4                      | 2      | 0    | 60       | 0          | 60      | 0         |
| CHC197T  | 73         | M      | AL       | 130             | yes                           | B    | III-IV   | F2-F3    | ≥24         | G6                      | 2      | 0.39 | 36       | 1          | 60      | 0         |
| CHC203T  | 45         | M      | AL       | 50              | no                            | A    | I-II     | F4       | ≥24         | G4                      | 2      | 0.21 | 15       | 0          | 15      | 0         |
| CHC205T  | 45         | M      | AL       | 100             | no                            | A    | III-IV   | F0-F1    | ≥24         | G3                      | 3      | 0.61 | 2        | 1          | 9       | 1         |
| CHC206T  | 63         | M      | HBV      | 40              | no                            | B    | III-IV   | F4       | <24         | G4                      | 2      | 0    | NE       | NE         | NE      | NE        |
| CHC208T  | 79         | M      | HCV AL   | 45              | yes                           | A    | III-IV   | F2-F3    | ≥24         | G3                      | 2      | 0.37 | 6        | 1          | 17      | 1         |
| CHC210T  | 58         | M      | HCV      | 50              | no                            | B    | III-IV   | F4       |             | G4                      | 2      | 0.24 | NE       | NE         | NE      | NE        |
| CHC211T  | 68         | M      | AL       | 80              | yes                           | C    | I-II     | F0-F1    | <24         | G4                      | 2      | 0.21 | 12       | 1          | 12      | 1         |
| CHC218T  | 69         | M      | Other    | 130             | yes                           | C    | III-IV   | F0-F1    | ≥24         | G4                      | 2      | 0.26 | NE       | NE         | NE      | NE        |
| CHC226T  | 42         | M      | HBV      | 190             | yes                           | C    | I-II     | F2-F3    |             | G3                      | 2      | 0.42 | NE       | NE         | NE      | NE        |
| CHC228T  | 48         | M      | Other    | 145             | yes                           | C    | III-IV   | F0-F1    | ≥24         | G1                      | 3      | 0.37 | 4        | 1          | 14      | 1         |
| CHC229T  | 64         | F      | HCV      | 55              | yes                           | A    | III-IV   | F4       | <24         | G3                      | 2      | 0.24 | NE       | NE         | NE      | NE        |
| CHC230T  | 70         | M      | Other    | 160             | no                            | A    | I-II     | F0-F1    | <24         | G5                      | 2      | 0.24 | 60       | 0          | 60      | 0         |
| CHC235T  | 66         | F      | HCV      | 30              | no                            | A    | I-II     | F4       | ≥24         | G1                      | 2      | 0.42 | 46       | 0          | 46      | 0         |
| CHC237T  | 26         | F      | HBV      | 125             | no                            | B    | III-IV   | F0-F1    | <24         | G1                      | 2      | 0.24 | 11       | 0          | 11      | 0         |
| CHC239T  | 21         | F      | HBV      | 100             | yes                           | A    | I-II     | F2-F3    | <24         | G2                      | 2      | 0.32 | 12       | 0          | 12      | 0         |
| CHC241T  | 59         | M      | HBV      | 30              | no                            | A    | III-IV   | F2-F3    | <24         | G4                      | 2      | 0.29 | 60       | 0          | 60      | 0         |
| CHC242T  | 69         | M      | Other    | 150             | no                            | A    | I-II     | F0-F1    | <24         | G6                      | 2      | 0.13 | 49       | 1          | 59      | 1         |
| CHC245T  | 62         | M      | HBV      | 3               | no                            | 0    | I-II     | F4       | <24         | G2                      | 2      | 0.34 | 9        | 1          | 13      | 1         |
| CHC250T  | 34         | M      | HBV HCV  | 70              | no                            | C    | I-II     | F4       | ≥24         | G1                      | 2      | 0.32 | NE       | NE         | NE      | NE        |



Supplementary Table 2: Clinical, histological and molecular data of HCC

| ID      | Age (year) | Gender | Etiology | Tumor size (mm) | Microscopic Vascular Invasion | BCLC | Edmonson | META VIR | AFP (ng/ml) | Transcriptome subgroups | Ploidy | FAA  | PFS time | PFS status | OS time | OS status |
|---------|------------|--------|----------|-----------------|-------------------------------|------|----------|----------|-------------|-------------------------|--------|------|----------|------------|---------|-----------|
| CHC252T | 57         | M      | HBV HCV  | 17              | no                            | 0    | I-II     | F2-F3    | ≥24         | G1                      | 3      | 0.55 | 33       | 1          | 60      | 0         |
| CHC253T | 66         | M      | Other    | 80              | yes                           | C    | III-IV   | F4       | <24         | G3                      | 2      | 0.03 | NE       | NE         | NE      | NE        |
| CHC254T | 62         | M      | HBV HCV  | 80              | yes                           | C    | III-IV   | F4       | <24         | G3                      | 4      | 0.53 | 8        | 1          | 14      | 0         |
| CHC258T | 56         | M      | Other    | 100             | no                            | A    | I-II     | F0-F1    |             | G5                      | 2      | 0.21 | 60       | 0          | 60      | 0         |
| CHC301T | 77         | M      | NASH     | 45              | no                            | B    | I-II     | F2-F3    | <24         | G3                      | 2      | 0.21 | 44       | 1          | 50      | 1         |
| CHC302T | 72         | M      | HCV      | 45              | no                            | A    | I-II     | F2-F3    |             | G5                      | 2      | 0.13 | 60       | 0          | 60      | 0         |
| CHC303T | 73         | M      | AL       | 90              | yes                           | A    | III-IV   | F4       | ≥24         | G5                      | 2      | 0.18 | NE       | NE         | NE      | NE        |
| CHC304T | 77         | M      | AL       | 180             | yes                           | C    | III-IV   | F0-F1    | ≥24         | G3                      | 3      | 0.71 | 6        | 1          | 22      | 1         |
| CHC306T | 67         | M      | HCV      | 20              | no                            | 0    | I-II     | F4       |             | G4                      | 2      | 0.13 | NE       | NE         | NE      | NE        |
| CHC307T | 53         | M      | AL       | 30              | yes                           | A    | III-IV   | F4       |             | G4                      | 2      | 0.16 | NE       | NE         | NE      | NE        |
| CHC309T | 69         | F      | HCV      | 20              | yes                           | 0    | III-IV   | F2-F3    |             | G2                      | 2      | 0.18 | NE       | NE         | NE      | NE        |
| CHC313T | 43         | F      | HCV      | 130             | yes                           | A    | III-IV   | F2-F3    | ≥24         | G4                      | 2      | 0.21 | 4        | 1          | 11      | 1         |
| CHC314T | 71         | M      | HCV AL   | 45              | no                            | A    | I-II     | F2-F3    | <24         | G4                      | 2      | 0.21 | 59       | 0          | 59      | 0         |
| CHC317T | 68         | F      | HCV      | 15              | no                            | A    | III-IV   | F4       |             | G5                      | 2      | 0.11 | NE       | NE         | NE      | NE        |
| CHC320T | 64         | M      | HCV AL   | 35              | no                            | B    | III-IV   | F4       |             | G6                      | 2      | 0.02 | NE       | NE         | NE      | NE        |
| CHC322T | 73         | M      | AL       | 40              | no                            | A    | III-IV   | F4       | <24         | G4                      | 3      | 0.58 | 21       | 1          | 21      | 1         |
| CHC326T | 48         | M      | HBV      | 18              | no                            | A    | I-II     | F4       |             | G4                      | 2      | 0.03 | NE       | NE         | NE      | NE        |
| CHC327T | 62         | M      | HCV      | 25              | no                            | A    | I-II     | F4       |             | G1                      | 2      | 0.13 | NE       | NE         | NE      | NE        |
| CHC333T | 72         | M      | AL       | 42              | no                            | A    | I-II     | F2-F3    | <24         | G5                      | 2      | 0.29 | NE       | NE         | NE      | NE        |
| CHC335T | 68         | M      | HBV      | 160             | yes                           | A    | I-II     | F2-F3    | ≥24         | G6                      | 2      | 0.05 | 59       | 0          | 59      | 0         |
| CHC339T | 26         | F      | HBV      | 100             | yes                           | C    | I-II     | F2-F3    | ≥24         | G2                      | 3      | 0.55 | 34       | 1          | 56      | 1         |
| CHC361T | 67         | F      | Other    | 60              | no                            | A    | I-II     | F0-F1    | <24         | G5                      | 2      | 0.03 | 60       | 0          | 60      | 0         |
| CHC398T | 50         | M      | HBV      | 40              | no                            | 0    | I-II     |          |             | G2                      | 2      | 0.21 | NE       | NE         | NE      | NE        |
| CHC399T | 67         | M      | HM       | 30              | no                            | A    | I-II     | F2-F3    | <24         | G6                      | 2      | 0.18 | 26       | 1          | 37      | 0         |
| CHC402T | 27         | M      | HBV HCV  | 65              | no                            | B    | I-II     | F4       | ≥24         | G2                      | 2      | 0.34 | 11       | 1          | 16      | 1         |
| CHC405T | 77         | M      | HM       | 43              | no                            | A    | I-II     | F0-F1    | <24         | G4                      | 2      | 0.05 | 38       | 0          | 38      | 0         |
| CHC429T | 61         | F      | Other    | 45              | yes                           | A    | III-IV   | F0-F1    | ≥24         | G5                      | 2      | 0.08 | 23       | 1          | 60      | 0         |
| CHC430T | 50         | M      | HCV      | 60              | yes                           | B    | III-IV   | F4       | <24         | G5                      | 2      | 0.05 | 8        | 1          | 8       | 1         |
| CHC433T | 69         | M      | AL       | 180             | yes                           | A    | I-II     | F0-F1    | <24         | G5                      | 2      | 0.34 | 11       | 1          | 15      | 1         |
| CHC434T | 71         | F      | Other    | 80              | no                            | A    | III-IV   | F0-F1    | ≥24         | G1                      | 4      | 0.5  | 26       | 1          | 60      | 0         |
| CHC437T | 59         | M      | AL       | 50              | no                            | A    | I-II     | F4       |             | G5                      | 2      | 0.18 | 13       | 1          | 24      | 1         |
| CHC438T | 75         | M      | Other    | 185             | no                            | A    | III-IV   | F0-F1    | <24         | G2                      | 2      | 0.32 | NE       | NE         | NE      | NE        |
| CHC441T | 77         | M      | HM       | 40              | no                            | A    | III-IV   | F0-F1    |             | G3                      | 2      | 0.18 | 6        | 1          | 7       | 1         |
| CHC445T | 55         | M      | HCV AL   | 14              | no                            | 0    | I-II     | F4       | ≥24         | G4                      | 2      | 0.03 | 13       | 0          | 13      | 0         |
| CHC465T | 42         | F      | Other    | 100             |                               | A    | I-II     | F0-F1    | <24         | G4                      | 2      | 0.08 | 60       | 0          | 60      | 0         |
| CHC469T | 32         | F      | Other    | 135             | yes                           | C    | III-IV   | F0-F1    | <24         | G6                      | 2      | 0.34 | 12       | 1          | 23      | 1         |
| CHC609T | 60         | M      | HBV AL   | 50              | yes                           | B    | III-IV   | F2-F3    | <24         | G5                      | 2      | 0.45 | 18       | 1          | 50      | 0         |
| CHC614T | 60         | M      | NASH     | 30              | yes                           | A    | III-IV   | F2-F3    | <24         | G5                      | 2      | 0.1  | 12       | 0          | 12      | 0         |
| CHC715T | 46         | M      | NASH AL  | 40              | yes                           | B    | III-IV   | F0-F1    | <24         | G4                      | 2      | 0.13 | NE       | NE         | NE      | NE        |
| CHC725T | 59         | M      | HBV      | 27              | no                            | A    | III-IV   | F4       | <24         | G2                      | 2      | 0.18 | NE       | NE         | NE      | NE        |
| CHC793T | 61         | M      | HM       | 80              | yes                           | A    | III-IV   | F0-F1    | ≥24         | G3                      | 2      | 0.35 | 20       | 1          | 37      | 1         |
| CHC794T | 72         | M      | HM       | 160             | yes                           | C    | III-IV   | F0-F1    | ≥24         | G3                      | 3      | 0.53 | 1        | 1          | 5       | 1         |
| CHC798T | 72         | M      | AL       | 95              | no                            | A    | I-II     | F0-F1    | <24         | G4                      | 2      | 0.18 | 16       | 0          | 16      | 0         |
| CHC882T | 54         | M      | AL       | 40              | no                            | A    | III-IV   | F0-F1    | <24         | G3                      | 2      | 0.21 | NE       | NE         | NE      | NE        |
| CHC891T | 72         | F      | Other    | 45              | yes                           | A    | III-IV   | F4       | ≥24         | G1                      | 2      | 0.25 | 7        | 1          | 16      | 1         |
| CHC909T | 69         | M      | Other    | 210             | yes                           | C    | III-IV   | F0-F1    | ≥24         | G3                      | 2      | 0.32 | 37       | 0          | 37      | 0         |
| CHC918T | 82         | M      | AL       | 95              | no                            | A    | I-II     | F0-F1    | <24         | G4                      | 2      | 0.13 | 45       | 0          | 45      | 0         |
| CHC961T | 57         | M      | AL       | 190             | yes                           | B    | III-IV   | F0-F1    | <24         | G5                      | 2      | 0.26 | 7        | 1          | 17      | 1         |
| CHC983T | 53         | M      | AL       | 50              | no                            | B    | III-IV   | F4       | <24         | G4                      | 2      | 0.05 | 6        | 1          | 27      | 1         |

AL= Alcohol intake; HM= Hemochromatosis

NE= patients non evaluable for survival (including transplantation, non curative resection)























Supplementary Table 3. List of all somatic mutations identified in the exome sequencing of 24 HCC

| HCC-ID   | Ensembl Gene ID | Gene symbol | Chromosome | Nucleotide (genomic position hg19) | Amino Acid        | Mutation Type |
|----------|-----------------|-------------|------------|------------------------------------|-------------------|---------------|
| CHC155T  | ENSG00000169946 | ZFPM2       | 8          | g.106814470G>T                     | p.Arg720Ser       | missense      |
| CHC051T  | ENSG00000005889 | ZFX         | X          | g.24229375T>C                      | p.Ile767Thr       | missense      |
| CHC205T  | ENSG00000165156 | ZHX1        | 8          | g.124265860A>T                     | p.Ile776Lys       | missense      |
| CHC302T  | ENSG00000043355 | ZIC2        | 13         | g.100635295T>G                     | p.Val326Gly       | missense      |
| CHC1052T | ENSG00000152926 | ZNF117      | 7          | g.64439872T>A                      | p.Asn26Ile        | missense      |
| CHC1055T | ENSG00000176293 | ZNF135      | 19         | g.58573055C>G                      | p.Phe59Leu        | missense      |
| CHC155T  | ENSG00000163848 | ZNF148      | 3          | g.124951325T>A                     | p.Ser749Cys       | missense      |
| CHC433T  | ENSG00000160321 | ZNF208      | 19         | g.22156815A>G                      | p.Tyr341His       | missense      |
| CHC301T  | ENSG00000167840 | ZNF232      | 17         | g.5013123C>A                       | p.Glu22X          | nonsense      |
| CHC302T  | ENSG00000213096 | ZNF254      | 19         | g.24288792del                      | p.Trp27CysfsX15   | deletion      |
| CHC306T  | ENSG00000090612 | ZNF268      | 12         | g.133768187A>G                     | p.Asn116Ser       | missense      |
| CHC205T  | ENSG00000182986 | ZNF320      | 19         | g.53383988G>T                      | p.Thr464Asn       | missense      |
| CHC1061T | ENSG00000189180 | ZNF33A      | 10         | g.38344510G>T                      | p.Gln486His       | missense      |
| CHC322T  | ENSG00000169981 | ZNF35       | 3          | g.44700400G>C                      | p.Cys182Ser       | missense      |
| CHC1035T | ENSG00000178338 | ZNF354B     | 5          | g.178310772G>C                     | p.Cys440Ser       | missense      |
| CHC1053T | ENSG00000198521 | ZNF43       | 19         | g.21992119 A>T                     | p.Asn240Lys       | missense      |
| CHC320T  | ENSG00000256807 | ZNF432      | 19         | g.52537268T>C                      | p.Tyr555Cys       | missense      |
| CHC301T  | ENSG00000140987 | ZNF434      | 16         | g.3433115C>A                       | p.Gly399X         | nonsense      |
| CHC306T  | ENSG00000196263 | ZNF471      | 19         | g.57029880T>A                      | p.Ser64Thr        | missense      |
| CHC306T  | ENSG00000142528 | ZNF473      | 19         | g.50550026C>T                      | p.His776Tyr       | missense      |
| CHC197T  | ENSG00000197037 | ZNF498      | 7          | g.99217399A>T                      | p.Gln57Leu        | missense      |
| CHC1052T | ENSG00000198633 | ZNF534      | 19         | g.52941267C>T                      | p.Pro198Leu       | missense      |
| CHC1053T | ENSG00000172006 | ZNF554      | 19         | g.2823070A>G                       | p.Glu29Gly        | missense      |
| CHC302T  | ENSG00000198028 | ZNF560      | 19         | g.9577515A>T                       | p.Leu703X         | nonsense      |
| CHC429T  | ENSG00000189144 | ZNF573      | 19         | g.38230055C>G                      | p.Glu446Gln       | missense      |
| CHC614T  | ENSG00000189190 | ZNF600      | 19         | g.53268984del                      | p.Phe675LeufsX7   | deletion      |
| CHC301T  | ENSG00000167554 | ZNF610      | 19         | g.52869830A>G                      | p.Tyr400Cys       | missense      |
| CHC614T  | ENSG00000160352 | ZNF714      | 19         | g.21281677 T>G                     | p.Trp35Gly        | missense      |
| CHC155T  | ENSG00000170396 | ZNF804A     | 2          | g.185801897_185801907del           | p.Ser593GluufsX29 | deletion      |
| CHC205T  | ENSG00000198783 | ZNF830      | 17         | g.33289670C>G                      | p.Ser362Cys       | missense      |
| CHC433T  | ENSG00000176371 | ZSCAN2      | 15         | g.85165076A>T                      | p.Arg550Ser       | missense      |
| CHC302T  | ENSG00000180532 | ZSCAN4      | 19         | g.58189906A>G                      | p.Tyr312Cys       | missense      |
| CHC197T  | ENSG00000131848 | ZSCAN5A     | 19         | g.56733297C>A                      | p.Gly380Cys       | missense      |
| CHC155T  | ENSG00000162415 | ZSWIM5      | 1          | g.45553765T>A                      | p.His247Leu       | missense      |

**Supplementary Table 4. Correlation between clinical, pathological and genomic features.**

| <b>Correlation with clinical and pathological features</b> |                                                                                                                                                                        |
|------------------------------------------------------------|------------------------------------------------------------------------------------------------------------------------------------------------------------------------|
| HBV infection                                              | IRF2 mutation (P=0.003); no CTNNB1 mutation (P=0.001); High FAA (P=0.01*); Homozygous deletion (P=0.03)                                                                |
| Alcohol intake                                             | ARID1A mutation (P=0.002)                                                                                                                                              |
| No etiology                                                | HNF1A mutation (P=0.008)                                                                                                                                               |
| Age < 60 years                                             | IRF2 mutation (P =0.002), no CTNNB1 mutation (P=0.05)                                                                                                                  |
| Poor tumor differentiation (Edmondson III-IV)              | High FAA (P=0.04*); High ploidy (P=0.03*) ; Homozygous deletion (P=0.04)                                                                                               |
| Well tumor differentiation (Edmondson I-II)                | High level G>T transversion (P=0.01*); HNF1A mutation (P=0.03)                                                                                                         |
| Non-cirrhotic liver                                        | High FAA (P=0.04*); high level G>T transversion (P=0.01*); RPS6KA3 mutation (P=0.05)                                                                                   |
| Large tumors (>50 mm)                                      | High FAA (P=0.004*)                                                                                                                                                    |
| High serum Alpha Foeto Protein (≥24 ng/ml)                 | High ploidy (P=0.01*); High FAA (P=0.03*); no CTNNB1 mutation (P=0.03); Homozygous deletion (P=0.008)                                                                  |
| Microscopic vascular invasion                              | Homozygous deletion (P=0.009)                                                                                                                                          |
| <b>Correlation between gene alterations</b>                |                                                                                                                                                                        |
| High FAA                                                   | High ploidy (P=1E-07*); G1-G3 transcriptomic (P=6E-05*); TP53 mutation (P=0.003*); AXIN1 mutation (P=0.02*); IRF2 mutation (P=0.01*); Homozygous deletion (P=0.00001*) |
| CTNNB1 mutation                                            | G5-G6 transcriptomic (P<1E-9); NFE2L2 mutation (P=0.01); ARID1A mutation (P=0.05); no TP53 mutation (P=0.0001); no AXIN1 mutation (P=0.006)                            |
| TP53 mutation                                              | G3 transcriptomic (P=0.0001)                                                                                                                                           |
| RPS6KA3 mutation                                           | AXIN1 mutation (P=0.02)                                                                                                                                                |
| IRF2 mutation                                              | G2 transcriptomic (P=0.0002)                                                                                                                                           |
| IL6ST mutation                                             | G6 transcriptomic (P=0.02)                                                                                                                                             |
| HNF1A mutation                                             | G4 transcriptomic (P=0.04)                                                                                                                                             |

\*Kruskal Wallis test

Supplementary Table 5: Focal Amplifications

| #HCC-ID  | Copy number | Start position (in bp) | End position (in bp) | Cytoband | Genes                                                                                                                                                                          |
|----------|-------------|------------------------|----------------------|----------|--------------------------------------------------------------------------------------------------------------------------------------------------------------------------------|
| CHC014T  | 6           | 73776674               | 73959878             | 1p31.1   |                                                                                                                                                                                |
| CHC014T  | 6           | 80208060               | 80416986             | 1p31.1   |                                                                                                                                                                                |
| CHC304T  | 7           | 115862255              | 115922523            | 1p13.2   |                                                                                                                                                                                |
| CHC309T  | 5           | 154750817              | 155186728            | 1q21.3   | ADAM15, DPM3, RAG1AP1, TRIM46, THBS3, EFNA4, CKS1B, EFNA1, PMVK, SHC1, MTX1, MUC1, DCST2, PBXIP1, LENEPI, KRTPCAP2, MIR92B, ZBTB7B, FLAD1, DCST1, EFNA3, PYGO2                 |
| CHC794T  | 6           | 156300083              | 156560501            | 1q22     | TTC24, C1orf182, C1orf61, IQGAP3, RHBG, MEF2D, MIR9-1                                                                                                                          |
| CHC314T  | 5           | 204440602              | 204632480            | 1q32.1   | MDM4                                                                                                                                                                           |
| CHC961T  | 6           | 217085750              | 217145697            | 1q41     |                                                                                                                                                                                |
| CHC205T  | 6           | 239587513              | 239659952            | 1q43     |                                                                                                                                                                                |
| CHC031T  | 5           | 54708409               | 55151439             | 2p16.2   | RPL23AP32, SPTBN1                                                                                                                                                              |
| CHC028T  | 6           | 126395813              | 127894614            | 2q14.3   | BIN1, GYPC                                                                                                                                                                     |
| CHC028T  | 6           | 165047346              | 167056427            | 2q24.3   | SCN1A, SCN3A, GRB14, GALNT3, SCN2A, COBLL1, SLC38A11, TTC21B, SNORA70F, CSRNP3                                                                                                 |
| CHC1065T | 5           | 192335295              | 195160637            | 2q32.3   | PCGEM1, SDPR, TMEFF2, OBFCA2                                                                                                                                                   |
| CHC1052T | 6           | 189910073              | 190237100            | 3q28     | TMEM207, CLDN16, CLDN1                                                                                                                                                         |
| CHC1055T | 6           | 11425013               | 12099334             | 4p15.33  |                                                                                                                                                                                |
| CHC1055T | 5           | 13265682               | 13484419             | 4p15.33  | HSP90A2P                                                                                                                                                                       |
| CHC1055T | 4           | 13940962               | 14099570             | 4p15.33  |                                                                                                                                                                                |
| CHC254T  | 8           | 55108295               | 55257610             | 4q12     |                                                                                                                                                                                |
| CHC339T  | 6           | 57368167               | 58136697             | 4q12     | REST, HOPX, IGFBP7, SPINK2, ARL9, C4orf14, POLR2B                                                                                                                              |
| CHC018T  | 6           | 66431910               | 67459960             | 4q13.1   |                                                                                                                                                                                |
| CHC1154T | 6           | 2866347                | 3104266              | 5p15.33  |                                                                                                                                                                                |
| CHC1154T | 6           | 3126446                | 4907777              | 5p15.33  | IRX1                                                                                                                                                                           |
| CHC1065T | 4           | 29342141               | 29625795             | 5p13.3   |                                                                                                                                                                                |
| CHC1154T | 6           | 42483694               | 43899601             | 5p13.1   | PAIP1, SEPP1, HMGCS1, CCL28, C5orf34, CCDC152, ZNF131, MGC42105, C5orf28, NNT, LOC153684, C5orf39                                                                              |
| CHC211T  | 5           | 65186000               | 66518705             | 5q12.3   | ERBB2IP, CD180, LOC100303749, MAST4, SFRS12                                                                                                                                    |
| CHC211T  | 6           | 73710425               | 76147233             | 5q13.3   | C5orf37, GFM2, HMGCRC, HEXB, ANKRD31, ENC1, NSA2, COL4A3BP, GCNT4, FAM169A, SV2C, IQGAP2, F2RL2, POLK, F2R, F2RL1, NCRUPAR                                                     |
| CHC304T  | 6           | 1374278                | 2064263              | 6p25.3   | FOXO1, FOXF2                                                                                                                                                                   |
| CHC097T  | 6           | 27835931               | 27847516             | 6p22.1   | HIST1H3I, HIST1H4L                                                                                                                                                             |
| CHC794T  | 5           | 43187767               | 43900442             | 6p21.1   | XPO5, SLC22A7, POLH, VEGFA, ABCCC10, YIPF3, RSPH9, CRIP3, DLK2, MAD2L1BP, C6orf108, ZNF318, C6orf154, POLR1C, GTPBP2, MRPS18A, TTBK1, TJAP1                                    |
| CHC033T  | 8           | 63961693               | 64269846             | 6q12     | LGSN                                                                                                                                                                           |
| CHC301T  | 5           | 64269848               | 65171418             | 6q12     | PHF3, PTP4A1                                                                                                                                                                   |
| CHC237T  | 5           | 66746844               | 67995170             | 6q12     |                                                                                                                                                                                |
| CHC242T  | 5           | 18864041               | 18935766             | 7p21.1   |                                                                                                                                                                                |
| CHC303T  | 8           | 70145074               | 70209636             | 7q11.22  |                                                                                                                                                                                |
| CHC303T  | 8           | 70387954               | 70521775             | 7q11.22  |                                                                                                                                                                                |
| CHC314T  | 5           | 79730562               | 80354228             | 7q21.11  |                                                                                                                                                                                |
| CHC121T  | 6           | 81176805               | 81273755             | 7q21.11  | GNAI1, CD36, GNAT3                                                                                                                                                             |
| CHC154T  | 5           | 128169980              | 128866388            | 7q32.1   | FLJ45340, IRF5, LOC407835, LOC286016, ATP6V1F, CALU, TNPO3, SMO, OPN1SW, FLNC, CDC136, FAM71F1, KCP, FAM71F2, TSPAN33                                                          |
| CHC465T  | 5           | 150977228              | 151926614            | 7q36.1   | RHEB, GALNT11, WDR86, PRKAG2, NUB1, CRYGN, GALNTL5                                                                                                                             |
| CHC051T  | 5           | 32716484               | 35319480             | 8p12     | DUSP26, FUT10, MAK16, C8orf41, RNF122                                                                                                                                          |
| CHC097T  | 8           | 34674920               | 34856370             | 8p12     |                                                                                                                                                                                |
| CHC301T  | 5           | 34889072               | 35316787             | 8p12     |                                                                                                                                                                                |
| CHC097T  | 6           | 35247298               | 35429072             | 8p12     |                                                                                                                                                                                |
| CHC1052T | 8           | 39495326               | 39587863             | 8p11.22  |                                                                                                                                                                                |
| CHC097T  | 7           | 40243955               | 40565815             | 8p11.21  |                                                                                                                                                                                |
| CHC1052T | 8           | 42858300               | 43195671             | 8p11.21  | SGK196, FNTA, HGSNAT                                                                                                                                                           |
| CHC051T  | 6           | 53363938               | 53579553             | 8q11.23  | FAM150A                                                                                                                                                                        |
| CHC302T  | 6           | 55437525               | 55476998             | 8q11.23  |                                                                                                                                                                                |
| CHC302T  | 5           | 56448941               | 57707933             | 8q12.1   | TGS1, RPS20, SDR16C6, MOS, LYN, PENK, SNORD54, CHCHD7, PLAG1, TMEM68, SDR16C5                                                                                                  |
| CHC302T  | 5           | 61984700               | 63436368             | 8q12.2   | ASPH, CLVS1                                                                                                                                                                    |
| CHC327T  | 7           | 80264466               | 82017371             | 8q21.13  | ZBTB10, TPD52, HEY1, STMN2, MRPS28, ZNF704                                                                                                                                     |
| CHC226T  | 6           | 83293873               | 84974523             | 8q21.13  |                                                                                                                                                                                |
| CHC399T  | 5           | 88696840               | 88740928             | 8q21.3   |                                                                                                                                                                                |
| CHC154T  | 5           | 13588522               | 13854996             | 10p13    | PRPF18                                                                                                                                                                         |
| CHC033T  | 8           | 114966497              | 115807015            | 10q25.3  | CASP7, C10orf81, NHLRC2, HABP2, ADRB1, NRAP, DCLRE1A                                                                                                                           |
| CHC033T  | 8           | 116040002              | 116519520            | 10q25.3  | AFAP1L2, ABLIM1                                                                                                                                                                |
| CHC1065T | 5           | 117996151              | 118116033            | 10q25.3  |                                                                                                                                                                                |
| CHC129T  | 6           | 30246777               | 30829829             | 11p14.1  | FSHB, MPPED2, C11orf46                                                                                                                                                         |
| CHC245T  | 8           | 67479309               | 69604526             | 11q13.2  | CHKA, SUV420H1, C11orf24, NDUF8, FGF4, MTL5, CPT1A, ORAOV1, ALDH3B1, IGHMBP2, UNC93B1, MRGPRF, CCND1, TCIRG1, MRPL21, SAFS3, GAL, FGF19, MYEOV, LRP5, TPCN2, LOC645332, MRGPRD |
| CHC008T  | 5           | 68346484               | 69585786             | 11q13.2  | MTL5, CPT1A, ORAOV1, IGHMBP2, MRGPRF, CCND1, MRPL21, GAL, FGF19, MYEOV, TPCN2, MRGPRD                                                                                          |
| CHC793T  | 5           | 72093615               | 72276605             | 11q13.4  |                                                                                                                                                                                |
| CHC918T  | 6           | 117128272              | 117428277            | 11q23.3  | BACE1, CEP164                                                                                                                                                                  |
| CHC226T  | 7           | 21531438               | 22358857             | 12p12.1  | ABCC9, GOLT1B, CMAS, RECQL, KCNJB8, C12orf39, LDHB, PYROXD1, GYS2                                                                                                              |
| CHC031T  | 8           | 22945809               | 23599348             | 12p12.1  |                                                                                                                                                                                |
| CHC226T  | 5           | 23677561               | 23700774             | 12p12.1  |                                                                                                                                                                                |
| CHC303T  | 7           | 53714869               | 54324068             | 12q13.13 | SP7, SP1, CALCOCO1, AMHR2, NPF, ATP5G2, PCBP2, ATF7, TARBP2, PRR13, MAP3K12                                                                                                    |
| CHC303T  | 8           | 59575431               | 61320898             | 12q14.1  | SLC16A7                                                                                                                                                                        |
| CHC033T  | 8           | 82113311               | 82378975             | 13q31.1  |                                                                                                                                                                                |
| CHC033T  | 8           | 86071403               | 88963675             | 13q31.1  | SLITRK5, SLITRK6                                                                                                                                                               |
| CHC961T  | 5           | 99527028               | 99670270             | 13q32.3  |                                                                                                                                                                                |
| CHC430T  | 5           | 73490925               | 74130927             | 16q22.3  |                                                                                                                                                                                |
| CHC430T  | 5           | 76372980               | 76624462             | 16q23.1  |                                                                                                                                                                                |
| CHC430T  | 5           | 79460568               | 79651292             | 16q23.2  | MAF                                                                                                                                                                            |
| CHC126T  | 6           | 27502030               | 28479798             | 17q11.2  | GIT1, CRYBA1, ANKRD13B, SSH2, MIR423, NUFIP2, ABHD15, TP53I13, TAOK1, EFCAB5, CORO6                                                                                            |
| CHC437T  | 5           | 28551666               | 28812119             | 17q11.2  | CPD, TMIGD1, BLMH                                                                                                                                                              |
| CHC1052T | 7           | 37201756               | 37288064             | 17q12    |                                                                                                                                                                                |

**Supplementary Table 5: Focal Amplifications**

| #HCC-ID  | Copy number | Start position (in bp) | End position (in bp) | Cytoband | Genes                                                                                                                                                                                                                                                                                                                                                                                                                                                                                                                                                                                                                                                                                                                         |
|----------|-------------|------------------------|----------------------|----------|-------------------------------------------------------------------------------------------------------------------------------------------------------------------------------------------------------------------------------------------------------------------------------------------------------------------------------------------------------------------------------------------------------------------------------------------------------------------------------------------------------------------------------------------------------------------------------------------------------------------------------------------------------------------------------------------------------------------------------|
| CHC126T  | 8           | 37770006               | 40107808             | 17q12    | KRT40,TMEM99,ZPBP2,PPP1R1B,ACLY,CDC6,CASC3,KRT17,KRT10,KRT34,KRT37,KRTA<br>P1-1,KRTAP2-2,KRT13,KRT24,KRT222,KRTAP1-<br>3,RARA,KRT15,KRT23,ERBB2,MED24,KRT12,KRT27,KRTAP3-3,KRTAP3-2,KRTAP3-<br>1,KRTAP1-5,KRTAP4-12,KRTAP4-5,KRTAP4-4,KRTAP4-3,KRTAP4-2,KRTAP4-1,KRTAP9-<br>2,KRTAP9-3,KRTAP9-9,KRTAP9-8,KRTAP9-4,KRTAP17-<br>1,KRT33B,KRT35,KRT32,EIF1,SCG5,NT5C3L,ORMDL3,KRT38,KRT9,KRTAP4-7,KRTAP4-<br>11,STARD3,HAP1,NR1D1,TOP2A,PGAP3,C17orf37,KRT19,FKBP10,SMARCE1,IKZF3,GJD<br>3,KLHL10,CSF3,KRT20,PSMD3,GSDMA,JUP,RAPGEF1,TCAP,GAST,THRA,WIPF2,TNS4,I<br>GFBP4,LOC730755,KLHL11,SNORD124,KRT33A,GSDMB,CCR7,KRT16,PNMT,GRB7,KRT<br>36,KRTAP4-8,KRT28,KRT25,KRTAP4-9,KRTAP2-1,KRT31,KRTAP2-<br>4,KRT14,KRT26,KRT39,MSL1 |
| CHC399T  | 5           | 2641036                | 2817051              | 18p11.32 | SMCHD1                                                                                                                                                                                                                                                                                                                                                                                                                                                                                                                                                                                                                                                                                                                        |
| CHC399T  | 5           | 13177131               | 13487484             | 18p11.21 |                                                                                                                                                                                                                                                                                                                                                                                                                                                                                                                                                                                                                                                                                                                               |
| CHC399T  | 5           | 13590753               | 13680931             | 18p11.21 | C18orf1                                                                                                                                                                                                                                                                                                                                                                                                                                                                                                                                                                                                                                                                                                                       |
| CHC155T  | 5           | 64801046               | 65220233             | 18q22.1  | DSEL                                                                                                                                                                                                                                                                                                                                                                                                                                                                                                                                                                                                                                                                                                                          |
| CHC1055T | 8           | 21215213               | 21277422             | 19p12    |                                                                                                                                                                                                                                                                                                                                                                                                                                                                                                                                                                                                                                                                                                                               |
| CHC1055T | 4           | 22779199               | 23447298             | 19p12    | ZNF99,ZNF492                                                                                                                                                                                                                                                                                                                                                                                                                                                                                                                                                                                                                                                                                                                  |
| CHC794T  | 8           | 49783102               | 50301544             | 19q13.33 | CD37,SNORD32A,SNORD35B,PTH2,RRAS,CPT1C,SLC17A7,SNORD35A,RCN3,PIH1D1,F<br>CGRT,SLC6A16,TEAD2,RPL13A,RPS11,NOSIP,TSKS,SNORD33,SCAF1,IRF3,ALDH16A1,P<br>RRG2,SNORD34,BCL2L12,CCDC155,FLT3LG,C19orf76,PRR12,PRMT1,DKKL1,RPL13AP5<br>,MIR150                                                                                                                                                                                                                                                                                                                                                                                                                                                                                       |
| CHC129T  | 5           | 34555834               | 34612159             | 21q22.11 |                                                                                                                                                                                                                                                                                                                                                                                                                                                                                                                                                                                                                                                                                                                               |
| CHC033T  | 8           | 18913603               | 19365285             | 22q11.21 | TSSK2,DGCR2,CLTCL1,DGCR14,GSC2,DGCR5,SLC25A1,DGCR9,DGCR11,DGCR10                                                                                                                                                                                                                                                                                                                                                                                                                                                                                                                                                                                                                                                              |
| CHC033T  | 8           | 20854162               | 21814927             | 22q11.21 | RIMBP3C,PI4KA,MED15,LZTR1,SLC7A4,AIFM3,SNAP29,HIC2,RIMBP3B,MGC16703,P2<br>RX6,CRKL,THAP7,POM121L8P,POM121L4P,TMEM191A,LOC400891,FUJ39582,SERPIN<br>D1,P2RX6P                                                                                                                                                                                                                                                                                                                                                                                                                                                                                                                                                                  |

Supplementary Table 6: Homozygous deletion

| #HCC-ID  | Start position (in bp) | End position (in bp) | Cytoband | Genes                                                                                                                                                                                                                                                                                                                   |
|----------|------------------------|----------------------|----------|-------------------------------------------------------------------------------------------------------------------------------------------------------------------------------------------------------------------------------------------------------------------------------------------------------------------------|
| CHC320T  | 1619542                | 1680218              | 1p36.33  | SLC35E2,CDK11B,CDK11A,LOC728661,MMP23A                                                                                                                                                                                                                                                                                  |
| CHC441T  | 3577322                | 3616600              | 1p36.32  | TP73                                                                                                                                                                                                                                                                                                                    |
| CHC317T  | 7971079                | 8652153              | 1p36.23  | ERRFI1,RERE,PARK7,TNFRSF9,SLC45A1                                                                                                                                                                                                                                                                                       |
| CHC317T  | 21682435               | 21766452             | 1p36.12  |                                                                                                                                                                                                                                                                                                                         |
| CHC402T  | 41013016               | 41054113             | 1p34.2   | ZNF684                                                                                                                                                                                                                                                                                                                  |
| CHC218T  | 50918389               | 51462438             | 1p32.3   | CDKN2C,FAF1                                                                                                                                                                                                                                                                                                             |
| CHC046T  | 178665594              | 178684822            | 1q25.2   |                                                                                                                                                                                                                                                                                                                         |
| CHC441T  | 204231501              | 204389313            | 1q32.1   | PPP1R15B,PLEKHA6,LOC127841                                                                                                                                                                                                                                                                                              |
| CHC218T  | 65524098               | 65680309             | 2p14     | SPRED2                                                                                                                                                                                                                                                                                                                  |
| CHC441T  | 65561393               | 65741614             | 2p14     | SPRED2                                                                                                                                                                                                                                                                                                                  |
| CHC304T  | 141466385              | 142035285            | 2q22.1   | LRP1B                                                                                                                                                                                                                                                                                                                   |
| CHC218T  | 186865607              | 187084688            | 2q32.1   |                                                                                                                                                                                                                                                                                                                         |
| CHC208T  | 232779224              | 234694176            | 2q37.1   | ALPP,NPPC,UGT1A5,UGT1A9,UGT1A4,UGT1A8,UGT1A10,KCNJ13,GIGYF2,UGT1A6,S<br>AG,EIF4E2,DGKD,UGT1A3,CHRNA,CHRND,UGT1A7,NEU2,TIGD1,ALPPL2,DNAJB3,NG<br>EF,UGT1A1,INPP5D,C2orf82,USP40,DIS3L2,SCARNA5,SCARNA6,ATG16L1,ALPI,ECEL1,<br>EFHD1,ECEL1P2                                                                              |
| CHC254T  | 233097787              | 233155565            | 2q37.1   | DIS3L2                                                                                                                                                                                                                                                                                                                  |
| CHC218T  | 65750653               | 65776339             | 3p14.1   | MAGI1                                                                                                                                                                                                                                                                                                                   |
| CHC226T  | 68512005               | 68678210             | 3p14.1   | FAM19A1                                                                                                                                                                                                                                                                                                                 |
| CHC218T  | 71074195               | 71254192             | 3p13     | FOXP1                                                                                                                                                                                                                                                                                                                   |
| CHC218T  | 114034099              | 114598528            | 3q13.31  | ZBTB20,MIR568                                                                                                                                                                                                                                                                                                           |
| CHC1199T | 162123180              | 162155075            | 3q26.1   |                                                                                                                                                                                                                                                                                                                         |
| CHC317T  | 38980065               | 39016074             | 4p14     | TMEM156                                                                                                                                                                                                                                                                                                                 |
| CHC218T  | 39496273               | 39614822             | 4p14     | C4orf34,UGDH                                                                                                                                                                                                                                                                                                            |
| CHC130T  | 44078423               | 44093498             | 4p13     |                                                                                                                                                                                                                                                                                                                         |
| CHC317T  | 62416500               | 62498950             | 4q13.1   | LPHN3                                                                                                                                                                                                                                                                                                                   |
| CHC123T  | 98701199               | 98809573             | 4q22.3   | C4orf37                                                                                                                                                                                                                                                                                                                 |
| CHC304T  | 108060030              | 108083470            | 4q25     |                                                                                                                                                                                                                                                                                                                         |
| CHC1199T | 122281108              | 122289862            | 4q27     | QRFPR                                                                                                                                                                                                                                                                                                                   |
| CHC239T  | 171252195              | 171312560            | 4q33     |                                                                                                                                                                                                                                                                                                                         |
| CHC239T  | 184882783              | 185220261            | 4q35.1   | STOX2,ENPP6                                                                                                                                                                                                                                                                                                             |
| CHC034T  | 184892635              | 185370065            | 4q35.1   | STOX2,ENPP6,IRF2                                                                                                                                                                                                                                                                                                        |
| CHC018T  | 185034184              | 185382060            | 4q35.1   | ENPP6,IRF2                                                                                                                                                                                                                                                                                                              |
| CHC012T  | 185148190              | 185400747            | 4q35.1   | IRF2                                                                                                                                                                                                                                                                                                                    |
| CHC239T  | 185282465              | 185490725            | 4q35.1   | IRF2                                                                                                                                                                                                                                                                                                                    |
| CHC1035T | 13201513               | 13367396             | 5p15.2   |                                                                                                                                                                                                                                                                                                                         |
| CHC891T  | 91575925               | 91893094             | 5q14.3   |                                                                                                                                                                                                                                                                                                                         |
| CHC121T  | 100995049              | 101168136            | 6q16.3   | ASCC3                                                                                                                                                                                                                                                                                                                   |
| CHC961T  | 108641306              | 109574094            | 6q21     | FOXO3,LACE1,SESN1,C6orf182,ARMC2                                                                                                                                                                                                                                                                                        |
| CHC794T  | 109863159              | 109917531            | 6q21     | AKD1                                                                                                                                                                                                                                                                                                                    |
| CHC218T  | 128313089              | 128691352            | 6q22.33  | PTPRK                                                                                                                                                                                                                                                                                                                   |
| CHC218T  | 148270823              | 148328366            | 6q24.3   |                                                                                                                                                                                                                                                                                                                         |
| CHC609T  | 166767384              | 166787242            | 6q27     | BRP44L                                                                                                                                                                                                                                                                                                                  |
| CHC301T  | 169924120              | 170142385            | 6q27     | WDR27,PHF10,TCTE3,C6orf120                                                                                                                                                                                                                                                                                              |
| CHC469T  | 78256343               | 78492641             | 7q21.11  | MAGI2                                                                                                                                                                                                                                                                                                                   |
| CHC218T  | 110677657              | 110733716            | 7q31.1   | IMMP2L,LRN3                                                                                                                                                                                                                                                                                                             |
| CHC218T  | 111596968              | 111723487            | 7q31.1   | DOCK4                                                                                                                                                                                                                                                                                                                   |
| CHC1055T | 3668652                | 3826044              | 8p23.2   | CSMD1                                                                                                                                                                                                                                                                                                                   |
| CHC1055T | 3829248                | 3854986              | 8p23.2   | CSMD1                                                                                                                                                                                                                                                                                                                   |
| CHC123T  | 13185927               | 13209660             | 8p22     | DLC1                                                                                                                                                                                                                                                                                                                    |
| CHC441T  | 17655407               | 17748919             | 8p22     | FGL1,MTUS1                                                                                                                                                                                                                                                                                                              |
| CHC031T  | 17739539               | 17759862             | 8p22     | FGL1                                                                                                                                                                                                                                                                                                                    |
| CHC441T  | 22210235               | 22340498             | 8p21.3   | SLC39A14,PIWIL2,PPP3CC                                                                                                                                                                                                                                                                                                  |
| CHC441T  | 25269103               | 25318252             | 8p21.2   | DOCK5,GNRH1,KCTD9,CDCA2                                                                                                                                                                                                                                                                                                 |
| CHC441T  | 38754531               | 38793681             | 8p11.22  | PLEKHA2                                                                                                                                                                                                                                                                                                                 |
| CHC1053T | 51029372               | 51042155             | 8q11.21  | SNTG1                                                                                                                                                                                                                                                                                                                   |
| CHC441T  | 3989790                | 4310557              | 9p24.2   | GLIS3                                                                                                                                                                                                                                                                                                                   |
| CHC304T  | 9253588                | 9516347              | 9p23     | PTPRD                                                                                                                                                                                                                                                                                                                   |
| CHC254T  | 12464877               | 12586943             | 9p23     |                                                                                                                                                                                                                                                                                                                         |
| CHC031T  | 21557407               | 22207036             | 9p21.3   | CDKN2BAS,CDKN2B,C9orf53,CDKN2A,MTAP,LOC554202                                                                                                                                                                                                                                                                           |
| CHC205T  | 21712194               | 22081396             | 9p21.3   | CDKN2BAS,CDKN2B,C9orf53,CDKN2A,MTAP                                                                                                                                                                                                                                                                                     |
| CHC130T  | 21920347               | 21997871             | 9p21.3   | CDKN2BAS,C9orf53,CDKN2A                                                                                                                                                                                                                                                                                                 |
| CHC433T  | 21953138               | 22044121             | 9p21.3   | CDKN2BAS,CDKN2B,C9orf53,CDKN2A                                                                                                                                                                                                                                                                                          |
| CHC235T  | 21954954               | 22056498             | 9p21.3   | CDKN2BAS,CDKN2B,C9orf53,CDKN2A                                                                                                                                                                                                                                                                                          |
| CHC1069T | 21966222               | 22028800             | 9p21.3   | CDKN2BAS,CDKN2B,C9orf53,CDKN2A                                                                                                                                                                                                                                                                                          |
| CHC218T  | 21980152               | 22130064             | 9p21.3   | CDKN2BAS,CDKN2B,CDKN2A                                                                                                                                                                                                                                                                                                  |
| CHC793T  | 21990458               | 22088259             | 9p21.3   | CDKN2BAS,CDKN2B,CDKN2A                                                                                                                                                                                                                                                                                                  |
| CHC218T  | 22861228               | 22963772             | 9p21.3   |                                                                                                                                                                                                                                                                                                                         |
| CHC218T  | 112418912              | 112924175            | 9q31.3   | PALM2,AKAP2,PALM2-AKAP2                                                                                                                                                                                                                                                                                                 |
| CHC158T  | 52558493               | 52616921             | 10q11.23 | A1CF                                                                                                                                                                                                                                                                                                                    |
| CHC158T  | 65000494               | 65194128             | 10q21.3  | JMJD1C,MIR1296                                                                                                                                                                                                                                                                                                          |
| CHC313T  | 89406642               | 89807851             | 10q23.2  | PTEN,PAPSS2,ATAD1,KILLIN,CFLP1                                                                                                                                                                                                                                                                                          |
| CHC1055T | 89495365               | 89725731             | 10q23.2  | PTEN,PAPSS2,ATAD1,KILLIN,CFLP1                                                                                                                                                                                                                                                                                          |
| CHC218T  | 96547464               | 96682513             | 10q23.33 | CYP2C19                                                                                                                                                                                                                                                                                                                 |
| CHC218T  | 104241684              | 104531049            | 10q24.32 | SFXN2,SUFU,TRIM8,ARL3,ACTR1A,C10orf26                                                                                                                                                                                                                                                                                   |
| CHC218T  | 109453933              | 109800375            | 10q25.1  |                                                                                                                                                                                                                                                                                                                         |
| CHC239T  | 122762147              | 122787761            | 10q26.12 |                                                                                                                                                                                                                                                                                                                         |
| CHC218T  | 131361225              | 131457178            | 10q26.3  | MGMT                                                                                                                                                                                                                                                                                                                    |
| CHC014T  | 25455060               | 26018892             | 11p14.3  |                                                                                                                                                                                                                                                                                                                         |
| CHC441T  | 46469901               | 46692869             | 11p11.2  | KIAA0652,AMBRA1,HARBI1                                                                                                                                                                                                                                                                                                  |
| CHC317T  | 129065881              | 129115637            | 11q24.3  |                                                                                                                                                                                                                                                                                                                         |
| CHC441T  | 12829915               | 12912803             | 12p13.1  | APOLD1,GPR19,CDKN1B                                                                                                                                                                                                                                                                                                     |
| CHC014T  | 28605427               | 28719699             | 12p11.22 | CCDC91                                                                                                                                                                                                                                                                                                                  |
| CHC1199T | 45613496               | 47562926             | 12q12    | SFRS2IP,AMIGO2,SLC38A4,ANO6,ARID2,SLC38A1,SLC38A2,LOC400027                                                                                                                                                                                                                                                             |
| CHC043T  | 50841058               | 53094938             | 12q13.12 | ACVRL1,SMAGP,KRT80,KRT71,KRT75,TMPRSS12,LETMD1,DIP2B,CSRNP2,BIN2,SLC4A<br>8,ACVR1B,ANKRD33,GRASP,KRT81,KRT83,KRT85,KRT6C,KRT72,LARP4,KRT6B,KRT6A,<br>NR4A1,KRT2,DAZAP2,METTL7A,KRT7,KRT5,KRT1,POU6F1,KRT86,CELA1,TFCP2,GALN<br>T6,SLC11A2,HIGD1C,ATF1,C12orf44,SCN8A,KRT73,KRT74,KRT77,LOC283404,FIGLN2,<br>KRT84,KRT82 |
| CHC1146T | 104845733              | 104849026            | 12q23.3  |                                                                                                                                                                                                                                                                                                                         |
| CHC129T  | 33678506               | 33754515             | 13q13.1  | STARD13                                                                                                                                                                                                                                                                                                                 |



Supplementary Table 6: Homozygous deletion

| #HCC-ID  | Start position (in bp) | End position (in bp) | Cytoband | Genes                                                                              |
|----------|------------------------|----------------------|----------|------------------------------------------------------------------------------------|
| CHC158T  | 48901433               | 49002353             | 13q14.2  | LPAR6, RB1                                                                         |
| CHC137T  | 56493080               | 56605491             | 13q21.1  |                                                                                    |
| CHC242T  | 70733845               | 70778216             | 13q21.33 |                                                                                    |
| CHC226T  | 75331094               | 75494108             | 13q22.1  |                                                                                    |
| CHC441T  | 58701881               | 58794000             | 14q23.1  | PSMA3, ARID4A, ACTR10, FLJ31306                                                    |
| CHC226T  | 44897746               | 45094018             | 15q21.1  | TRIM69, B2M, SPG11, PATL2                                                          |
| CHC012T  | 203255                 | 362637               | 16p13.3  | ITFG3, HBA2, AXIN1, HBQ1, ARHGDIG, RGS11, PDIA2, HBA1, HBZ, LUC7L, HBM             |
| CHC031T  | 265160                 | 341078               | 16p13.3  | ITFG3, AXIN1, ARHGDIG, RGS11, PDIA2, LUC7L                                         |
| CHC1199T | 347185                 | 357139               | 16p13.3  | AXIN1                                                                              |
| CHC014T  | 349222                 | 377793               | 16p13.3  | AXIN1                                                                              |
| CHC1154T | 19941969               | 19971789             | 16p12.3  |                                                                                    |
| CHC018T  | 20509697               | 20552074             | 16p12.3  | ACSM2B                                                                             |
| CHC081T  | 65986968               | 66130755             | 16q21    |                                                                                    |
| CHC250T  | 72823076               | 73087493             | 16q22.2  | ZFH3                                                                               |
| CHC158T  | 78201954               | 78504997             | 16q23.1  | WWOX                                                                               |
| CHC014T  | 78817230               | 79079658             | 16q23.1  | WWOX                                                                               |
| CHC130T  | 89094244               | 89122738             | 16q24.3  |                                                                                    |
| CHC469T  | 2641106                | 2860023              | 17p13.3  | RAP1GAP2, MIR1253                                                                  |
| CHC218T  | 9097934                | 9304542              | 17p13.1  | NTN1, STX8                                                                         |
| CHC137T  | 10765210               | 10830183             | 17p12    |                                                                                    |
| CHC226T  | 16068423               | 16219791             | 17p11.2  | NCOR1, PIGL, MIR1288                                                               |
| CHC441T  | 25630652               | 25759163             | 18q12.1  | CDH2                                                                               |
| CHC402T  | 65290715               | 65318535             | 18q22.1  |                                                                                    |
| CHC033T  | 66758990               | 66758996             | 18q22.1  |                                                                                    |
| CHC1035T | 1                      | 406369               | 19p13.3  | THEG, PPA2C, C2CD4C, MIER2, FAM138A, FAM138F, FAM138C, FLJ45445, OR4F17, LOC375690 |
| CHC441T  | 1124032                | 1189481              | 19p13.3  | SBN02                                                                              |
| CHC614T  | 1132638                | 1238898              | 19p13.3  | C19orf26, SBN02, STK11                                                             |
| CHC441T  | 2050824                | 2221791              | 19p13.3  | MKNK2, MOBKL2A, C19orf36, DOT1L, AP3D1                                             |
| CHC301T  | 2141210                | 2211049              | 19p13.3  | DOT1L, AP3D1                                                                       |
| CHC441T  | 11023435               | 11146498             | 19p13.2  | CARM1, SMARCA4, YIPF2, C19orf52                                                    |
| CHC235T  | 43368962               | 43556842             | 19q13.2  | PSG11, PSG6, PSG7, PSG1                                                            |
| CHC208T  | 54717302               | 54759570             | 19q13.42 | LILRB5, LILRB3, LILRA6                                                             |
| CHC304T  | 15058883               | 15113007             | 20p12.1  | MACROD2                                                                            |
| CHC441T  | 23348888               | 23392839             | 21q21.1  |                                                                                    |
| CHC013T  | 27336169               | 27548329             | 21q21.3  | APP                                                                                |
| CHC013T  | 32736170               | 33090757             | 21q22.11 | SFRS15, SOD1, TIAM1                                                                |
| CHC909T  | 18624959               | 18631364             | 22q11.21 |                                                                                    |
| CHC441T  | 24707113               | 24865186             | 22q11.23 | C22orf45, CYTSA, ADORA2A                                                           |
| CHC218T  | 28411919               | 29083204             | 22q12.1  | TTC28                                                                              |
| CHC239T  | 6451753                | 8141016              | Xp22.31  | HDHD1A, STS, VCX3A, PNPLA4, VCX2, VCX, MIR651                                      |
| CHC303T  | 9456802                | 9543469              | Xp22.31  | TBL1X                                                                              |
| CHC014T  | 10458876               | 10621475             | Xp22.2   | MID1                                                                               |
| CHC137T  | 28770686               | 29133142             | Xp21.3   | IL1RAPL1                                                                           |
| CHC130T  | 36786480               | 37191430             | Xp21.1   | FAM47C                                                                             |
| CHC1192T | 53087477               | 53115704             | Xp11.22  | GPR173, TSPYL2                                                                     |
| CHC307T  | 82330914               | 82460172             | Xq21.1   |                                                                                    |
| CHC218T  | 96165910               | 97165453             | Xq21.33  | DIAPH2                                                                             |
| CHC441T  | 96441494               | 96623615             | Xq21.33  | DIAPH2                                                                             |
| CHC218T  | 104311117              | 104454049            | Xq22.3   | IL1RAPL2                                                                           |
| CHC218T  | 111421285              | 111609731            | Xq23     | ZCCHC16                                                                            |
| CHC034T  | 134809429              | 134865393            | Xq26.3   | CT45A1                                                                             |

Supplementary table 7. Complete list of gene mutations found in a series of validation of 125 HCC.

| #HCC-ID  | Ensembl Gene ID | Gene symbol | Chromosome | Nucleotide (genomic hg19)  | cDNA               | Amino Acid           |
|----------|-----------------|-------------|------------|----------------------------|--------------------|----------------------|
| CHC013T  | ENSG00000168036 | CTNNB1      | 3          | g.41266124A>G              | c.121A>G           | p.Thr41Ala           |
| CHC028T  | ENSG00000168036 | CTNNB1      | 3          | g.41266098A>G              | c.95A>G            | p.Asp32Gly           |
| CHC037T  | ENSG00000168036 | CTNNB1      | 3          | g.41266137C>T              | c.134C>T           | p.Ser45Phe           |
| CHC046T  | ENSG00000168036 | CTNNB1      | 3          | g.41266103G>A              | c.100G>A           | p.Gly34Arg           |
| CHC051T  | ENSG00000168036 | CTNNB1      | 3          | g.41266100T>C              | c.97T>C            | p.Ser33Pro           |
| CHC059T  | ENSG00000168036 | CTNNB1      | 3          | g.41266124A>G              | c.121A>G           | p.Thr41Ala           |
| CHC097T  | ENSG00000168036 | CTNNB1      | 3          | g.41266136T>C              | c.133T>C           | p.Ser45Pro           |
| CHC115T  | ENSG00000168036 | CTNNB1      | 3          | g.41266136T>C              | c.133T>C           | p.Ser45Pro           |
| CHC121T  | ENSG00000168036 | CTNNB1      | 3          | g.41266136T>G              | c.133T>G           | p.Ser45Ala           |
| CHC130T  | ENSG00000168036 | CTNNB1      | 3          | g.41266101C>T              | c.98C>T            | p.Ser33Phe           |
| CHC164T  | ENSG00000168036 | CTNNB1      | 3          | g.41266110A>C              | c.107A>C           | p.His36Pro           |
| CHC168T  | ENSG00000168036 | CTNNB1      | 3          | g.41266101C>G              | c.98C>G            | p.Ser33Cys           |
| CHC197T  | ENSG00000168036 | CTNNB1      | 3          | g.41266137C>T              | c.134C>T           | p.Ser45Phe           |
| CHC211T  | ENSG00000168036 | CTNNB1      | 3          | g.41265926_41266306del     | c.14-91_241+62del  | deletion exon 3      |
| CHC230T  | ENSG00000168036 | CTNNB1      | 3          | g.41268766A>T              | c.1004A>T          | p.Lys335Ile          |
| CHC242T  | ENSG00000168036 | CTNNB1      | 3          | g.41266136T>C              | c.133T>C           | p.Ser45Pro           |
| CHC252T  | ENSG00000168036 | CTNNB1      | 3          | g.41268766A>T              | c.1004A>T          | p.Lys335Ile          |
| CHC301T  | ENSG00000168036 | CTNNB1      | 3          | g.41266107T>G              | c.104T>G           | p.Ile35Ser           |
| CHC302T  | ENSG00000168036 | CTNNB1      | 3          | g.41266137C>A              | c.134C>A           | p.Ser45Tyr           |
| CHC303T  | ENSG00000168036 | CTNNB1      | 3          | g.41266110A>C              | c.107A>C           | p.His36Pro           |
| CHC317T  | ENSG00000168036 | CTNNB1      | 3          | g.41266124A>G              | c.121A>G           | p.Thr41Ala           |
| CHC320T  | ENSG00000168036 | CTNNB1      | 3          | g.41266113C>G              | c.110C>G           | p.Ser37Cys           |
| CHC333T  | ENSG00000168036 | CTNNB1      | 3          | g.41266107T>G              | c.104T>G           | p.Ile35Ser           |
| CHC335T  | ENSG00000168036 | CTNNB1      | 3          | g.41266100T>C              | c.97T>C            | p.Ser33Pro           |
| CHC361TB | ENSG00000168036 | CTNNB1      | 3          | g.41265566_41266581del     | c.7_378del         | p.Thr3_Ala126del     |
| CHC399T  | ENSG00000168036 | CTNNB1      | 3          | g.41266101C>G              | c.98C>G            | p.Ser33Cys           |
| CHC429T  | ENSG00000168036 | CTNNB1      | 3          | g.41266101C>G              | c.98C>G            | p.Ser33Cys           |
| CHC430T  | ENSG00000168036 | CTNNB1      | 3          | g.41266136T>C              | c.133T>C           | p.Ser45Pro           |
| CHC433T  | ENSG00000168036 | CTNNB1      | 3          | g.41266098A>G              | c.95A>G            | p.Asp32Gly           |
| CHC437T  | ENSG00000168036 | CTNNB1      | 3          | g.41266124A>G              | c.121A>G           | p.Thr41Ala           |
| CHC469T  | ENSG00000168036 | CTNNB1      | 3          | g.41266103G>A              | c.100G>A           | p.Gly34Arg           |
| CHC609T  | ENSG00000168036 | CTNNB1      | 3          | g.41266113C>G              | c.110C>G           | p.Ser37Cys           |
| CHC614T  | ENSG00000168036 | CTNNB1      | 3          | g.41266125C>A              | c.122C>A           | p.Thr41Asn           |
| CHC798T  | ENSG00000168036 | CTNNB1      | 3          | g.41266101C>G              | c.98C>G            | p.Ser33Cys           |
| CHC918T  | ENSG00000168036 | CTNNB1      | 3          | g.41266137C>T              | c.134C>T           | p.Ser45Phe           |
| CHC983T  | ENSG00000168036 | CTNNB1      | 3          | g.41274899G>T              | c.1149G>T          | p.Trp383Cys          |
| CHC983T  | ENSG00000168036 | CTNNB1      | 3          | g.41242294A>G              | c.874A>G           | p.Lys292Glu          |
| CHC1040T | ENSG00000168036 | CTNNB1      | 3          | g.41266136T>C              | c.133T>C           | p.Ser45Pro           |
| CHC1041T | ENSG00000168036 | CTNNB1      | 3          | g.41266098A>T              | c.95A>T            | p.Asp32Val           |
| CHC1052T | ENSG00000168036 | CTNNB1      | 3          | g.41266129_41266134dup     | c.126_131dup       | p.Ala43_Pro44dup     |
| CHC1069T | ENSG00000168036 | CTNNB1      | 3          | g.41266098A>C              | c.95A>C            | p.Asp32Ala           |
| CHC1146T | ENSG00000168036 | CTNNB1      | 3          | g.41266100T>C              | c.97T>C            | p.Ser33Pro           |
| CHC008T  | ENSG00000141510 | TP53        | 17         | g.7578272G>C               | c.577C>G           | p.His193Asp          |
| CHC013T  | ENSG00000141510 | TP53        | 17         | g.7577556C>A               | c.725G>T           | p.Cys242Phe          |
| CHC014T  | ENSG00000141510 | TP53        | 17         | g.7577534C>A               | c.747G>T           | p.Arg249Ser          |
| CHC033T  | ENSG00000141510 | TP53        | 17         | g.7577556C>T               | c.725G>A           | p.Cys242Tyr          |
| CHC037T  | ENSG00000141510 | TP53        | 17         | g.7579420dup               | c.267dup           | p.Ser90LeufsX59      |
| CHC043T  | ENSG00000141510 | TP53        | 17         | g.7577534C>A               | c.747G>T           | p.Arg249Ser          |
| CHC046T  | ENSG00000141510 | TP53        | 17         | g.7577610T>C               | c.673-2A>G         | splicing             |
| CHC100T  | ENSG00000141510 | TP53        | 17         | g.7577081T>A               | c.857A>T           | p.Glu286Val          |
| CHC126T  | ENSG00000141510 | TP53        | 17         | g.7577085C>T               | c.853G>A           | p.Glu285Lys          |
| CHC129T  | ENSG00000141510 | TP53        | 17         | g.7578445A>C               | c.485T>G           | p.Ile162Ser          |
| CHC137T  | ENSG00000141510 | TP53        | 17         | g.7574012C>A               | c.1015G>T          | p.Glu339X            |
| CHC154T  | ENSG00000141510 | TP53        | 17         | g.7577602del               | c.679del           | p.Ser227LeufsX20     |
| CHC208T  | ENSG00000141510 | TP53        | 17         | g.7578190T>G               | c.659A>C           | p.Tyr220Ser          |
| CHC226T  | ENSG00000141510 | TP53        | 17         | g.7577534C>A               | c.747G>T           | p.Arg249Ser          |
| CHC229T  | ENSG00000141510 | TP53        | 17         | g.7578212G>A               | c.637C>T           | p.Arg213X            |
| CHC245T  | ENSG00000141510 | TP53        | 17         | g.7577550C>T               | c.731G>A           | p.Gly244Asp          |
| CHC254T  | ENSG00000141510 | TP53        | 17         | g.7577568C>A               | c.713G>T           | p.Cys238Phe          |
| CHC304T  | ENSG00000141510 | TP53        | 17         | g.7579398_7579439dup       | c.248_289dup       | p.Ala83_Ser96dup     |
| CHC314T  | ENSG00000141510 | TP53        | 17         | g.7578395G>A               | c.535C>T           | p.His179Tyr          |
| CHC327T  | ENSG00000141510 | TP53        | 17         | g.7577545T>C               | c.736A>G           | p.Met246Val          |
| CHC402T  | ENSG00000141510 | TP53        | 17         | g.7577535C>T               | c.746G>A           | p.Arg249Lys          |
| CHC793T  | ENSG00000141510 | TP53        | 17         | g.7573982C>A               | c.1045G>T          | p.Glu349X            |
| CHC882T  | ENSG00000141510 | TP53        | 17         | g.7577058C>A               | c.880G>T           | p.Glu294X            |
| CHC1035T | ENSG00000141510 | TP53        | 17         | g.7577534C>A               | c.747G>T           | p.Arg249Ser          |
| CHC1055T | ENSG00000141510 | TP53        | 17         | g.7579502_7579518dup       | c.169_185dup       | p.Ala63ThrfsX66      |
| CHC1061T | ENSG00000141510 | TP53        | 17         | g.7574017C>A               | c.1010G>T          | p.Arg337Leu          |
| CHC013T  | ENSG00000117713 | ARID1A      | 1          | g.27106961_27106969del     | c.6572_6580del     | p.Ser2191_Gly2193del |
| CHC014T  | ENSG00000117713 | ARID1A      | 1          | g.27089676C>T              | c.2632C>T          | p.Gln878X            |
| CHC100T  | ENSG00000117713 | ARID1A      | 1          | g.27107082_27107094del     | c.6693_6705del     | p.Met2231IlefsX32    |
| CHC121T  | ENSG00000117713 | ARID1A      | 1          | g.27023209_27023228del     | c.315_334del       | p.Asn106ProfsX4      |
| CHC155T  | ENSG00000117713 | ARID1A      | 1          | g.27056173dup              | c.1169dup          | p.Met390IlefsX10     |
| CHC205T  | ENSG00000117713 | ARID1A      | 1          | g.27099939_27099964delinsG | c.3818_3843delinsG | p.Met1273AArgfsX8    |
| CHC211T  | ENSG00000117713 | ARID1A      | 1          | g.27106934_27106953del     | c.6545_6564del     | p.Ala2182GlufsX36    |
| CHC230T  | ENSG00000117713 | ARID1A      | 1          | g.27023381G>A              | c.487G>A           | p.Ala163Thr          |
| CHC241T  | ENSG00000117713 | ARID1A      | 1          | g.27089501dup              | c.2457dup          | p.Asn820GlnfsX52     |
| CHC303T  | ENSG00000117713 | ARID1A      | 1          | g.27107163_27107181del     | c.6774_6792del     | p.Leu2259ArgfsX2     |
| CHC320T  | ENSG00000117713 | ARID1A      | 1          | g.27106640T>A              | c.6251T>A          | p.Val2084Asp         |
| CHC335T  | ENSG00000117713 | ARID1A      | 1          | g.27106649G>A              | c.6260G>A          | p.Gly2087Glu         |
| CHC339T  | ENSG00000117713 | ARID1A      | 1          | g.27106159delinsAA         | c.5770delinsAA     | p.Glu1924LysfsX5     |
| CHC433T  | ENSG00000117713 | ARID1A      | 1          | g.27023909del              | c.1015del          | p.Ala339LeufsX24     |
| CHC434T  | ENSG00000117713 | ARID1A      | 1          | g.27023909_27023923del     | c.1015_1029del     | p.Ala345_Ala349del   |

Supplementary table 7. Complete list of gene mutations found in a series of validation of 125 HCC.

| #HCC-ID  | Ensembl Gene ID | Gene symbol | Chromosome | Nucleotide (genomic hg19)              | cDNA                           | Amino Acid         |
|----------|-----------------|-------------|------------|----------------------------------------|--------------------------------|--------------------|
| CHC437T  | ENSG00000117713 | ARID1A      | 1          | g.27097692dup                          | c.3281dup                      | p.Gln1095AlafsX10  |
| CHC445T  | ENSG00000117713 | ARID1A      | 1          | g.27087897_27087911delinsT             | c.2184_2198delinsT             | p.Pro729GlyfsX83   |
| CHC983T  | ENSG00000117713 | ARID1A      | 1          | g.27099008C>T                          | c.3424C>T                      | p.Gln1142X         |
| CHC1040T | ENSG00000117713 | ARID1A      | 1          | g.27056214C>T                          | c.1210C>T                      | p.Gln404X          |
| CHC1053T | ENSG00000117713 | ARID1A      | 1          | g.27023213_27023222del                 | c.319_328del                   | p.Ala107GlyfsX4    |
| CHC018T  | ENSG00000103126 | AXIN1       | 16         | g.396458G>A                            | c.568C>T                       | p.Gln190X          |
| CHC226T  | ENSG00000103126 | AXIN1       | 16         | g.347764_347765del                     | c.1741_1742del                 | p.Ser581CysfsX9    |
| CHC237T  | ENSG00000103126 | AXIN1       | 16         | g.364557_364563dup                     | c.999_1005dup                  | p.Thr336ValfsX17   |
| CHC250T  | ENSG00000103126 | AXIN1       | 16         | g.347143G>T                            | c.1868C>A                      | p.Ser623X          |
| CHC306T  | ENSG00000103126 | AXIN1       | 16         | g.396233C>A                            | c.793G>T                       | p.Gly265X          |
| CHC314T  | ENSG00000103126 | AXIN1       | 16         | g.360068del                            | c.1021del                      | p.Asp341MetfsX73   |
| CHC327T  | ENSG00000103126 | AXIN1       | 16         | g.348113C>A                            | c.1393G>T                      | p.Glu465X          |
| CHC434T  | ENSG00000103126 | AXIN1       | 16         | g.347772G>T                            | c.1734C>A                      | p.Tyr578X          |
| CHC438T  | ENSG00000103126 | AXIN1       | 16         | g.396962G>A                            | c.64C>T                        | p.Arg22X           |
| CHC1052T | ENSG00000103126 | AXIN1       | 16         | g.397014T>G                            | c.12A>C                        | p.Gln4His          |
| CHC1053T | ENSG00000103126 | AXIN1       | 16         | g.347930C>T                            | c.1576G>A                      | p.Ala526Thr        |
| CHC1065T | ENSG00000103126 | AXIN1       | 16         | g.354326dup                            | c.1232dup                      | p.Arg412AlafsX12   |
| CHC1154T | ENSG00000103126 | AXIN1       | 16         | g.347929G>A                            | c.1577C>T                      | p.Ala526Val        |
| CHC1190T | ENSG00000103126 | AXIN1       | 16         | g.347909G>A                            | c.1597C>T                      | p.Arg533X          |
| CHC1201T | ENSG00000103126 | AXIN1       | 16         | g.347903C>T                            | c.1603G>A                      | p.Val535Ile        |
| CHC237T  | ENSG00000103126 | AXIN1       | 16         | g.348122C>T                            | c.1384G>A                      | p.Ala462Thr        |
| CHC018T  | ENSG00000177189 | RPS6KA3     | X          | g.20183143_20183145delinsC             | c.1636_1638delinsG             | p.Leu546ValfsX4    |
| CHC034T  | ENSG00000177189 | RPS6KA3     | X          | g.20185706C>T                          | c.1602+1G>A                    | splicing           |
| CHC037T  | ENSG00000177189 | RPS6KA3     | X          | g.20183078A>T                          | c.1703T>A                      | p.Leu568Gln        |
| CHC115T  | ENSG00000177189 | RPS6KA3     | X          | g.20206653C>G                          | c.594-1G>C                     | splicing           |
| CHC226T  | ENSG00000177189 | RPS6KA3     | X          | g.20206644A>G                          | c.602T>C                       | p.Leu201Pro        |
| CHC258T  | ENSG00000177189 | RPS6KA3     | X          | g.20194611C>A                          | c.940G>T                       | p.Gly314X          |
| CHC309T  | ENSG00000177189 | RPS6KA3     | X          | g.20181087_20181095delinsC             | c.1828_1836delinsG             | p.Thr610AspfsX11   |
| CHC429T  | ENSG00000177189 | RPS6KA3     | X          | g.20222175T>C                          | c.290A>G                       | p.Tyr97Cys         |
| CHC434T  | ENSG00000177189 | RPS6KA3     | X          | g.20206044A>T                          | c.676T>A                       | p.Tyr226Asn        |
| CHC1044T | ENSG00000177189 | RPS6KA3     | X          | g.20284689C>A                          | c.62G>T                        | p.Ser21Ile         |
| CHC1053T | ENSG00000177189 | RPS6KA3     | X          | g.20181154A>C                          | c.1769T>G                      | p.Leu590X          |
| CHC1154T | ENSG00000177189 | RPS6KA3     | X          | g.20185727C>A                          | c.1582G>T                      | p.Glu528X          |
| CHC1044T | ENSG00000177189 | RPS6KA3     | X          | g.20205954C>T                          | c.766G>A                       | p.Val256Met        |
| CHC1053T | ENSG00000177189 | RPS6KA3     | X          | g.20205972C>T                          | c.748G>A                       | p.Asp250Asn        |
| CHC154T  | ENSG00000135100 | HNF1        | 12         | g.121432125dup                         | c.872dup                       | p.Gly292ArgfsX25   |
| CHC154T  | ENSG00000135100 | HNF1        | 12         | g.121432002A>C                         | c.749A>C                       | p.Gln250Pro        |
| CHC155T  | ENSG00000135100 | HNF1        | 12         | g.121437143C>T                         | c.1574C>T                      | p.Thr525Ile        |
| CHC196T  | ENSG00000135100 | HNF1        | 12         | g.121426688A>T                         | c.379A>T                       | p.Asn127Tyr        |
| CHC196T  | ENSG00000135100 | HNF1        | 12         | g.121426804G>T                         | c.495G>T                       | p.Trp165Cys        |
| CHC465T  | ENSG00000135100 | HNF1        | 12         | g.121416642_121416653del               | c.71_82del                     | p.Ile27_Leu30del   |
| CHC465T  | ENSG00000135100 | HNF1        | 12         | g.121432000_121432017del               | c.747_764del                   | p.Gln250_Gly255del |
| CHC1061T | ENSG00000135100 | HNF1        | 12         | g.121426649_121426652de                | c.340_343del                   | p.Arg114TrpfsX40   |
| CHC1061T | ENSG00000135100 | HNF1        | 12         | g.121431485_121431515del               | c.689_713+6del                 | p.Glu230GlyfsX104  |
| CHC059T  | ENSG00000116044 | NFE2L2      | 2          | g.178098797_178098805del               | c.240_248del                   | p.Gly81_Phe83del   |
| CHC205T  | ENSG00000116044 | NFE2L2      | 2          | g.178098959T>C                         | c.86A>G                        | p.Asp29Gly         |
| CHC317T  | ENSG00000116044 | NFE2L2      | 2          | g.178098807T>G                         | c.238A>C                       | p.Thr80Pro         |
| CHC614T  | ENSG00000116044 | NFE2L2      | 2          | g.178098789T>A                         | c.256A>T                       | p.Ile86Phe         |
| CHC1040T | ENSG00000116044 | NFE2L2      | 2          | g.178098799T>G                         | c.246A>C                       | p.Glu82Asp         |
| CHC1041T | ENSG00000116044 | NFE2L2      | 2          | g.178098807T>G                         | c.238A>C                       | p.Thr80Pro         |
| CHC1069T | ENSG00000116044 | NFE2L2      | 2          | g.178098803C>A                         | c.242G>T                       | p.Gly81Val         |
| CHC1190T | ENSG00000116044 | NFE2L2      | 2          | g.178098960C>G                         | c.85G>C                        | p.Asp29His         |
| CHC614T  | ENSG00000116044 | NFE2L2      | 2          | g.178098800T>C                         | c.245A>G                       | p.Glu82Gly         |
| CHC123T  | ENSG00000189079 | ARID2       | 12         | g.46243449G>A                          | c.1802G>A                      | p.Arg601Gln        |
| CHC126T  | ENSG00000189079 | ARID2       | 12         | g.46240646_46240647dup                 | c.1506_1507dup                 | p.Ala503GlyfsX4    |
| CHC429T  | ENSG00000189079 | ARID2       | 12         | g.46244040G>T                          | c.2134G>T                      | p.Glu712X          |
| CHC614T  | ENSG00000189079 | ARID2       | 12         | g.46287229C>G                          | c.5174C>G                      | p.Ser1725X         |
| CHC725T  | ENSG00000189079 | ARID2       | 12         | g.46245893_46245894insGTTAGGTGAGATTGGA | c.3987_3988insGTTAGGTGAGATTGGA | p.Leu1330ValfsX3   |
| CHC1044T | ENSG00000189079 | ARID2       | 12         | g.46231153C>G                          | c.1073C>G                      | p.Thr358Ser        |
| CHC429T  | ENSG00000189079 | ARID2       | 12         | g.46243361A>G                          | c.1716-2A>G                    | splicing           |
| CHC205T  | ENSG00000150394 | CDH8        | 16         | g.60412498G>C                          | c.856C>G                       | p.Pro286Ala        |
| CHC429T  | ENSG00000150394 | CDH8        | 16         | g.60412513A>G                          | c.841T>C                       | p.Tyr281His        |
| CHC1199T | ENSG00000150394 | CDH8        | 16         | g.60318497A>C                          | c.1536+2T>G                    | splicing           |
| CHC339T  | ENSG00000168310 | IRF2        | 4          | g.185329422_185329435del               | c.412-6_419del                 | deletion           |
| CHC398T  | ENSG00000168310 | IRF2        | 4          | g.185339323T>G                         | c.409A>C                       | p.Lys137Gln        |
| CHC059T  | ENSG00000134352 | IL6ST       | 5          | g.55260053_55260055del                 | c.577_579del                   | p.Asn193del        |
| CHC469T  | ENSG00000134352 | IL6ST       | 5          | g.55260061_55260075del                 | c.557_571del                   | p.Tyr186_Tyr190del |
| CHC205T  | ENSG00000101292 | PROKR2      | 20         | g.5294732A>G                           | c.284T>C                       | p.Leu95Pro         |
| CHC429T  | ENSG00000101292 | PROKR2      | 20         | g.5283292del                           | c.549del                       | p.Ile184LeufsX56   |
| CHC037T  | ENSG00000133703 | KRAS        | 12         | g.25380275T>A                          | c.183A>T                       | p.Gln61His         |
| CHC339T  | ENSG00000133703 | KRAS        | 12         | g.25398285C>T                          | c.34G>A                        | p.Gly12Ser         |
| CHC137T  | ENSG00000134982 | APC         | 5          | g.112175957dup                         | c.4666dup                      | p.Thr1556AsnfsX3   |
| CHC205T  | ENSG00000134982 | APC         | 5          | g.112176007dup                         | c.4716dup                      | p.Glu1573X         |
| CHC235T  | ENSG00000121879 | PIK3CA      | 3          | g.178952085A>G                         | c.3140A>G                      | p.His1047Arg       |
| CHC438T  | ENSG00000121879 | PIK3CA      | 3          | g.178952085A>T                         | c.3140A>T                      | p.His1047Leu       |
| CHC469T  | ENSG00000147889 | CDKN2A      | 9          | g.21971096C>A                          | c.262G>T                       | p.Glu88X           |

**Supplementary Table 8: Pathway significantly enriched in the 1150 genes altered by either mutation or homozygous deletion**

| Pathway Names                         | p-values | FDR p-values |
|---------------------------------------|----------|--------------|
| Phosphatidylinositol signaling system | 0.001    | 0.01         |
| Wnt signaling pathway                 | 0.001    | 0.01         |
| Long-term potentiation                | 0.001    | 0.01         |
| Axon guidance                         | 0.003    | 0.02         |
| Focal adhesion                        | 0.004    | 0.02         |
| Cell cycle                            | 0.005    | 0.02         |
| Complement and coagulation cascades   | 0.005    | 0.03         |
| p53 signaling pathway                 | 0.02     | 0.06         |
| Gap junction                          | 0.02     | 0.06         |
| ECM-receptor interaction              | 0.02     | 0.07         |
| MAPK signaling pathway                | 0.02     | 0.07         |
| Apoptosis                             | 0.03     | 0.09         |
| Adherens junction                     | 0.03     | 0.1          |
| B cell receptor signaling pathway     | 0.03     | 0.1          |
| Insulin signaling pathway             | 0.03     | 0.1          |
| Ubiquitin mediated proteolysis        | 0.03     | 0.1          |
